# Supplementary material
Source: publisher figshare collection journal article supplement (https://acs.figshare.com/ndownloader/files/4553491)
Supplement: Supplementary file 1 [file 4553491]

# Emission Mechanism of Doubly *ortho*-Linked Quinoxaline/Diphenylfluorene or *cis*-Stilbene/Fluorene Hybrid Compounds Based on the Transient Absorption and Emission Measurements during the Pulse Radiolysis

Yi Wei,<sup>†,‡</sup> Shingo Samori,<sup>‡</sup> Sachiko Tojo,<sup>‡</sup> Mamoru Fujitsuka,<sup>‡</sup> Jin-Sheng Lin,<sup>†</sup> Chien-Tien Chen,<sup>\*,†</sup> and Tetsuro Majima<sup>\*,‡</sup>

Department of Chemistry, National Taiwan Normal University, Taipei, Taiwan 11650 and the Institute of Scientific and Industrial Research (SANKEN), Osaka University, Mihogaoka 8-1, Ibaraki, Osaka 567-0047, Japan.

## SUPPORTING INFORMATION

Experimental details, spectral data of compounds **1-4** and OLED device measurements for **1a-e**, **2a**, **3d**, **3f**, and **4f** (25 pages).

## Table of Content

|                                                                                                                                                                                  |         |
|----------------------------------------------------------------------------------------------------------------------------------------------------------------------------------|---------|
| General .....                                                                                                                                                                    | S3      |
| Experimental procedures and characterization for compounds <b>1-4</b> .....                                                                                                      | S3-S10  |
| CV spectra for <b>1a-e</b> , <b>2a</b> , <b>3d</b> , <b>3f</b> , and <b>4f</b> .....                                                                                             | S10     |
| Stacked plots of emission spectra of <b>1e</b> (a) and <b>3f</b> (b) by steady-state at $10^{-5}$ M (green) and pulse radiolysis (red) measurements in Ar-saturated benzene..... | S10     |
| Time-resolved transient absorption spectrum stacked plots of <b>3d</b> .....                                                                                                     | S11     |
| Decay profiles of the transient absorption spectra for <b>1a-e</b> , <b>2a</b> , <b>3d</b> , <b>3f</b> , and <b>4f</b> .....                                                     | S12     |
| OLED device measurements for <b>1a-e</b> , <b>3d</b> , <b>3f</b> , and <b>4f</b> .....                                                                                           | S12-S13 |
| $^1\text{H}$ and $^{13}\text{C}$ NMR spectra for <b>1-4</b> .....                                                                                                                | S14-S24 |
| References .....                                                                                                                                                                 | S25     |

**General.**  $^1\text{H}$  NMR and  $^{13}\text{C}$  NMR spectra were recorded on Jeol JNM-EX400 (400 MHz  $^1\text{H}$ , 100 MHz  $^{13}\text{C}$ ) spectrometers in deuteriochloroform with chloroform as an internal reference unless otherwise stated. Chemical shifts are reported in ppm ( $\delta$ ). Coupling constants,  $J$ , are reported in Hz. Mass spectra were recorded on a Finnigan TCQ-700 GC/LC/MS spectrometer with an ionization voltage of 70 or 20 eV unless otherwise stated. High-resolution mass spectra were measured on a Finnigan MAT 95S spectrometer. Combustion analyses were performed on a Perkin-Elmer 2400-CHN analyzer by the Northern Instrument Center of Taiwan. Fast atom bombardment (FAB) mass spectra were recorded on a Finnigan MAT-95S spectrometer. Data are reported in the form  $m/e$  (intensity relative to base peak). Analytical TLC was performed on Merck silica gel plates with QF-254 indicator. Visualization was accomplished with UV light or with phosphomolybdic acid (PMA) and  $\text{KMnO}_4$  staining agents. Column (flash) chromatography was performed using 32-63  $\mu\text{m}$  silica gel. All reagents were purchased from ACROS, ALDRICH, and TCI with purification in advance before use. Solvents for extraction and chromatography were reagent grade. Dichloromethane and chlorobenzene were dried over  $\text{CaH}_2$  before use. Diethyl ether, THF, 1,2-dimethoxyethane (DME) and toluene were dried over Na with benzophenone-ketyl intermediate as indicator. All reactions were run under argon.

**Spiro-fluorene-dibenzosuberene[d](1,4-dibromo-quinoxaline) (1)<sup>1</sup>**

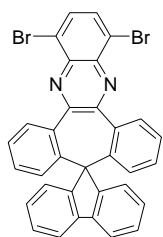

To a 50-mL, two-necked, round-bottomed flask was placed **Spiro-fluorene-dibenzosuberene-10,11-dione** (745 mg, 2 mmol), 1,2-diamino-3,6-dibromobenzene (585 mg, 2.2 mmol) and catalytic *p*-TSA in  $\text{CHCl}_3$  (20 mL). The reaction mixture was stirred under reflux for 12 hours. After having been quenched with saturated aqueous  $\text{NaHCO}_3$  (20 mL), the mixture was extracted with  $\text{CH}_2\text{Cl}_2$  ( $3 \times 20$  mL). The combined organic layers were dried ( $\text{MgSO}_4$ ), filtered, and evaporated. The crude residue was purified by column chromatography on silica gel to give **1**, which was further re-crystallized from  $\text{CH}_2\text{Cl}_2$  to afford pure **1** (1084 mg, 90 %): m.p. 287  $^\circ\text{C}$  (DSC); M.W.: 602.32;  $^1\text{H}$  NMR (400 MHz,  $\text{CDCl}_3$ )  $\delta$  8.52 (dd,  $J = 7.6, 1.3$ , 2H), 8.03 (s, 2H), 7.75 (d,  $J = 7.6$ , 2H), 7.47 (td,  $J = 7.6, 1.6$ , 2H), 7.34 (t,  $J = 7.6$ , 2H), 7.25-7.19 (m, 4H), 7.07 (t,  $J = 7.6$ , 2H), 6.76 (d,  $J = 7.6$ , 2H);  $^{13}\text{C}$  NMR (100 MHz,  $\text{CDCl}_3$ )  $\delta$  154.31, 149.39, 145.86, 140.02, 140.00, 136.99,

134.42, 133.36, 130.19, 128.55, 128.03, 128.01, 127.64, 127.23, 124.12, 120.48, 66.54; MS (ESI) 603.4 ( $M+H^+$ , 100); TLC  $R_f$  0.30 (hexanes/ $CH_2Cl_2$ , 3/1).

**Spiro-fluorene-dibenzosuberene[d](1,4-bis(4-methoxyphenyl)quinoxaline) (1a)<sup>2</sup>**

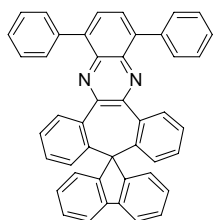

To a 50-mL, two-necked, round-bottomed flask was placed **1** (602 mg, 1 mmol) and  $Pd(PPh_3)_4$  (35 mg, 0.03 mmol) in DME (25 mL). A solution of phenylboronic acid (293 mg, 2.4 mmol) and  $Na_2CO_3$  (318 mg, 3 mmol) in degassed water (12 mL) was added and the whole solution was refluxed for 24 hours. The reaction mixture was quenched with water (20 mL) and extracted with  $CH_2Cl_2$  ( $3 \times 20$  mL). The combined organic layers were dried ( $MgSO_4$ ), filtered, and evaporated. The crude residue was purified by column chromatography on silica gel to give **1a**, which was further re-crystallized from  $CH_2Cl_2$ /hexanes to afford pure **1a** (555 mg, 93 %): m.p. 316 °C (DSC);  $T_d$  361 °C (TGA);  $T_g$  122 °C (DSC); M.W.: 596.72;  $^1H$  NMR (400 MHz,  $CDCl_3$ )  $\delta$  8.33 (dd,  $J = 7.9, 1.3$ , 2H), 8.04 (s, 2H), 7.94 (d,  $J = 7.2$ , 4H), 7.75 (d,  $J = 7.6$ , 2H), 7.54 (t,  $J = 7.2$ , 4H), 7.45 (t,  $J = 7.2$ , 4H), 7.37-7.32 (m, 4H), 7.20-7.13 (m, 4H), 7.08 (t,  $J = 7.6$ , 2H), 6.84 (d,  $J = 7.6$ , 2H);  $^{13}C$  NMR (100 MHz,  $CDCl_3$ )  $\delta$  151.85, 149.71, 145.50, 140.09, 139.64, 138.43, 138.43, 138.25, 133.74, 131.01, 130.30, 129.33, 128.32, 128.01, 127.92, 127.85, 127.72, 127.62, 127.16, 120.39, 66.65; MS (ESI) 597.6 ( $M+H^+$ , 100); TLC  $R_f$  0.35 (EtOAc/hexanes, 1/12); HR-MS calcd for  $C_{45}H_{28}N_2$ : 596.2252, found: 596.2256; Anal. Calcd for  $C_{45}H_{28}N_2$ : C, 90.58, H, 4.73, N, 4.69. Found: C, 90.19, H, 5.01, N, 4.52.

**Spiro-fluorene-dibenzosuberene[d](1,4-bis(4-methoxyphenyl)quinoxaline) (1b)**

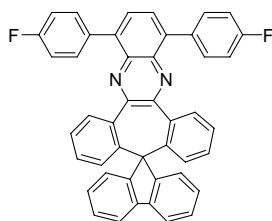

To a 50-mL, two-necked, round-bottomed flask was placed **1** (602 mg, 1 mmol) and  $Pd(PPh_3)_4$  (35 mg, 0.03 mmol) in DME (25 mL). A solution of 4-fluorophenylboronic acid (336 mg, 2.4 mmol) and  $Na_2CO_3$  (318 mg, 3 mmol) in degassed water (12 mL) was added and the whole solution was refluxed for 24 hours. The reaction mixture was quenched with water (20 mL) and extracted with  $CH_2Cl_2$  ( $3 \times 20$  mL). The combined organic layers were dried ( $MgSO_4$ ), filtered, and evaporated. The crude residue was purified by column chromatography on silica gel to give **1b**, which was further re-crystallized from

CH<sub>2</sub>Cl<sub>2</sub>/hexanes to afford pure **1b** (854 mg, 90 %): m.p. 298 °C (DSC); T<sub>d</sub> 362 °C (TGA); T<sub>g</sub> 161 °C (DSC); M.W.: 632.70; <sup>1</sup>H NMR (400 MHz, CDCl<sub>3</sub>) δ 8.26 (d, *J* = 7.5, 2H), 7.97 (s, 2H), 7.88 (dd, *J* = 8.7, 5.5, 4H), 7.75 (d, *J* = 7.6, 2H), 7.37-7.32 (m, 4H), 7.24-7.13 (m, 8H), 7.07 (t, *J* = 7.6, 2H), 6.80 (d, *J* = 7.3, 2H); <sup>13</sup>C NMR (100 MHz, CDCl<sub>3</sub>) δ 163.86, 161.41, 151.97, 145.30, 149.60, 145.44, 140.08, 139.48, 139.06, 138.04, 134.20, 133.57, 132.51, 130.01, 129.45, 128.36, 127.94, 127.72, 127.12, 120.42, 114.93, 66.58; MS (FAB) 633.07 (M<sup>+</sup>, 5); TLC R<sub>f</sub> 0.32 (EtOAc/hexanes, 1/12); HR-MS calcd for C<sub>45</sub>H<sub>26</sub>N<sub>2</sub>F<sub>2</sub>: 632.2064, found: 632.2060; Anal. Calcd for C<sub>45</sub>H<sub>26</sub>N<sub>2</sub>F<sub>2</sub>: C, 85.42, H, 4.14, N, 4.43. Found: C, 85.15, H, 4.34, N, 4.53.

**Spiro-fluorene-dibenzosuberene[d](1,4-bis(4-*t*-butylphenyl)Quinoxaline) (**1c**)**

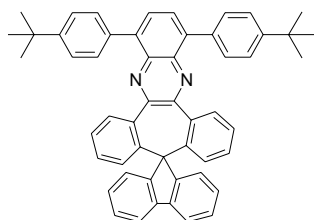

To a 50-mL, two-necked, round-bottomed flask was placed **1** (602 mg, 1 mmol) and Pd(PPh<sub>3</sub>)<sub>4</sub> (35 mg, 0.03 mmol) in DME (25 mL). A solution of 4-*t*-butylphenylboronic acid (427 mg, 2.4 mmol) and Na<sub>2</sub>CO<sub>3</sub> (318 mg, 3 mmol) in degassed water (12 mL) was added and the resulting mixture was refluxed for 24 hours. The reaction mixture was cooled to ambient temperature and quenched with water (20 mL). The whole mixture was extracted with dichloromethane (3 × 20 mL). The combined organic layers were dried (MgSO<sub>4</sub>), filtered, and evaporated. The crude residue was purified by column chromatography on silica gel to give **1c**, which was further re-crystallized from CH<sub>2</sub>Cl<sub>2</sub>/hexanes to afford pure **1c** (631 mg, 89 %): m.p. 402 °C (DSC); T<sub>d</sub> 395 °C (TGA); T<sub>g</sub> 181 °C (DSC); M.W.: 708.93; <sup>1</sup>H NMR (400 MHz, CDCl<sub>3</sub>) δ 8.37 (d, *J* = 7.6, 2H), 8.01 (s, 2H), 7.89 (d, *J* = 8.4, 4H), 7.71 (d, *J* = 7.6, 2H), 7.55 (d, *J* = 8.4, 4H), 7.36 (td, *J* = 7.6, 2.2, 2H), 7.30 (t, *J* = 7.6, 2H), 7.17-7.11 (m, 4H), 7.04 (bd, 2H), 6.80 (bd, 2H), 1.40 (s, 18H); <sup>13</sup>C NMR (100 MHz, CDCl<sub>3</sub>) δ 151.64, 150.45, 149.59, 145.35, 140.02, 139.72, 139.55, 138.31, 135.48, 133.69, 130.58, 130.24, 129.19, 128.27, 127.83, 127.69, 127.10, 124.98, 120.28, 66.56, 34.63, 31.40; MS (ESI) 709.7 (M+H<sup>+</sup>, 100); TLC R<sub>f</sub> 0.30 (EtOAc/hexanes, 1/12).

### Spiro-fluorene-dibenzosuberene[d](1,4-bis(4-methoxyphenyl)quinoxaline) (**1d**)

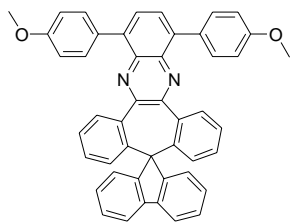

To a 50-mL, two-necked, round-bottomed flask was placed **1** (602 mg, 1 mmol) and Pd(PPh<sub>3</sub>)<sub>4</sub> (35 mg, 0.03 mmol) in DME (25 mL). A solution of 4-methoxyphenylboronic acid (365 mg, 2.4 mmol) and Na<sub>2</sub>CO<sub>3</sub> (318 mg, 3 mmol) in degassed water (12 mL) was added and the whole solution was refluxed for 24 hours. The reaction mixture was quenched with water (20 mL) and extracted with CH<sub>2</sub>Cl<sub>2</sub> (3 × 20 mL). The combined organic layers were dried (MgSO<sub>4</sub>), filtered, and evaporated. The crude residue was purified by column chromatography on silica gel to give **1d**, which was further re-crystallized from CH<sub>2</sub>Cl<sub>2</sub>/hexanes to afford pure **1d** (624 mg, 95 %): m.p. 344 °C (DSC); T<sub>d</sub> 372 °C (TGA); T<sub>g</sub> 160 °C (DSC); M.W.: 656.77; <sup>1</sup>H NMR (400 MHz, CDCl<sub>3</sub>) δ 8.32 (d, *J* = 7.6, 2H), 7.97 (s, 2H), 7.88 (d, *J* = 8.8, 4H), 7.74 (d, *J* = 7.6, 2H), 7.37-7.30 (m, 4H), 7.18-7.12 (m, 4H), 7.08 (bd, 2H), 7.06 (d, *J* = 8.8, 4H), 6.82 (bd, 2H), 3.89 (s, 6H); <sup>13</sup>C NMR (100 MHz, CDCl<sub>3</sub>) δ 159.27, 151.51, 149.66, 145.30, 140.05, 139.65, 139.04, 138.30, 133.66, 132.07, 130.90, 129.81, 129.21, 128.26, 127.86, 127.69, 127.11, 120.33, 113.50, 66.59, 55.33; MS (ESI) 657.7 (M+H<sup>+</sup>, 100); TLC R<sub>f</sub> 0.32 (EtOAc/hexanes, 1/10).

### Spiro-fluorene-dibenzosuberene[d](1-(4-(*N,N*-diphenylamino)-phenyl)-quinoxaline) (**1e**)

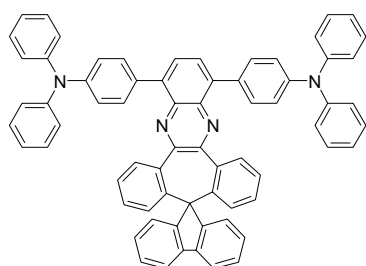

To a 50-mL, two-necked, round-bottomed flask was placed **1** (602 mg, 1 mmol) and Pd(PPh<sub>3</sub>)<sub>4</sub> (35 mg, 0.03 mmol) in DME (25 mL). A solution of 4-(*N,N*-diphenylamino)phenylboronic acid (694 mg, 2.4 mmol) and Na<sub>2</sub>CO<sub>3</sub> (318 mg, 3 mmol) in degassed water (12 mL) was added and the whole solution was refluxed for 24 hours. The reaction mixture was quenched with water (20 mL) and extracted with CH<sub>2</sub>Cl<sub>2</sub> (3 × 20 mL). The combined organic layers were dried (MgSO<sub>4</sub>), filtered, and evaporated. The crude residue was purified by column chromatography on silica gel to give **1e**, which was further re-crystallized from CH<sub>2</sub>Cl<sub>2</sub>/hexanes to afford pure **1e** (857 mg, 92 %): m.p. 351 °C (DSC); T<sub>d</sub> 412 °C (TGA); T<sub>g</sub> 186 °C (DSC); M.W.: 931.13; <sup>1</sup>H NMR (400 MHz, CDCl<sub>3</sub>) δ 8.35 (d, *J* = 7.3, 2H), 7.98 (s, 2H), 7.81 (d, *J* = 8.7, 4H), 7.72 (d, *J* = 7.4, 2H), 7.34-7.26 (m, 12H), 7.22-7.13 (m, 16H), 7.04 (t,

$J = 7.2$ , 6H), 6.79 (d,  $J = 7.1$ , 2H);  $^{13}\text{C}$  NMR (100 MHz,  $\text{CDCl}_3$ )  $\delta$  151.5, 149.7, 147.8, 147.4, 145.4, 140.1, 139.7, 139.1, 138.3, 133.7, 132.3, 131.7, 129.8, 129.3, 128.3, 127.9, 127.2, 124.7, 123.0, 122.7, 120.4, 66.6; MS (FAB) 931.4 ( $\text{M}+\text{H}^+$ , 100); TLC  $R_f$  0.38 ( $\text{EtOAc}/\text{CH}_2\text{Cl}_2$ , 1/3).

### 5H-dibenzosuberene[d](1,4-bis(4-methoxyphenyl)quinoxaline) (2a)

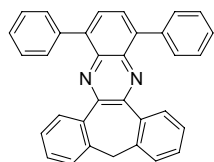

To a 50-mL, two-necked, round-bottomed flask was placed **5H-dibenzo[a,d]cycloheptene-10,11-dione**<sup>3</sup> (444 mg, 2 mmol), [1,1';4',1'']terphenyl-2',3'-diamine<sup>4</sup> (573 mg, 2.2 mmol) and catalytic *p*-TSA in  $\text{CHCl}_3$  (20 mL). The reaction mixture was stirred under reflux for 12 hours. After having been quenched with saturated aqueous  $\text{NaHCO}_3$  (20 mL), the mixture was extracted with  $\text{CH}_2\text{Cl}_2$  ( $3 \times 20$  mL). The combined organic layers were dried ( $\text{MgSO}_4$ ), filtered, and evaporated. The crude residue was purified by column chromatography on silica gel to give **2a**, which was further re-crystallized from  $\text{CH}_2\text{Cl}_2$  to afford pure **2a** (813 mg, 91 %): m.p. 298 °C (DSC);  $T_d$  377 °C (TGA);  $T_g$  98 °C (DSC); M.W.: 446.54;  $^1\text{H}$  NMR (400 MHz,  $\text{CDCl}_3$ )  $\delta$  8.02 (d,  $J = 7.2$ , 2H), 7.96 (s, 2H), 7.92 (d,  $J = 7.4$ , 4H), 7.54 (t,  $J = 7.6$ , 4H), 7.45 (t,  $J = 7.4$ , 2H), 7.40-7.32 (m, 6H), 4.00 (d,  $J = 13.5$ , 1H), 3.75 (d,  $J = 13.5$ , 1H);  $^{13}\text{C}$  NMR (100 MHz,  $\text{CDCl}_3$ )  $\delta$  150.76, 142.24, 139.99, 139.42, 138.44, 136.55, 131.28, 130.94, 130.15, 129.81, 127.96, 127.54, 127.08, 126.90, 40.34; MS (ESI) 447.7 ( $\text{M}+\text{H}^+$ , 100); TLC  $R_f$  0.4 ( $\text{CH}_2\text{Cl}_2/\text{hexanes}$ , 1/3); HR-MS calcd for  $\text{C}_{33}\text{H}_{22}\text{N}_2$ : 446.5412, found: 446.1788.

### 3,7-Dibromo-5,5-spirofluorenyl-5H-dibenzo[a,d]cycloheptene (3)<sup>5</sup>

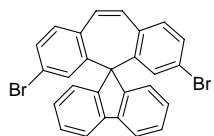

To a 250-mL, three-necked, round-bottomed flask was placed a solution of 2-bromobiphenyl (3497 mg, 15 mmol) in THF (50 mL). The reaction flask was cooled to -78 °C and *n*-BuLi (2.5 M in hexanes, 6 mL, 15 mmol) was added dropwise. The whole solution was stirred at this temperature for 30 minutes followed by adding a solution of **3,7-Dibromo-dibenzo[a,d]cyclohepten-5-one** (3640 mg, 10 mmol) in THF (30 mL). The resulting mixture was gradually warmed to ambient temperature and then quenched with saturated, aqueous  $\text{NaHCO}_3$  (30 mL). The mixture was extracted with  $\text{CH}_2\text{Cl}_2$  ( $3 \times 50$  mL). The combined organic layers were dried ( $\text{MgSO}_4$ ), filtered, and evaporated under reduced pressure. The crude residue dissolved in acetic acid

(15 mL) was placed in another 100-mL, two-necked, round-bottomed flask. Catalytic amount of aqueous HCl (12*N*, 5mol%) was then added and the whole mixture was refluxed for 30 minutes. After having been cooled to ambient temperature, the whole mixture was extracted with CH<sub>2</sub>Cl<sub>2</sub> (3 × 20 mL). The combined organic layers were dried (MgSO<sub>4</sub>), filtered, and evaporated. The crude residue was purified by column chromatography on silica gel to give **3**, which was further re-crystallized from CH<sub>2</sub>Cl<sub>2</sub>/hexanes to afford 4852 mg of pure **3** (97 %): m.p. 283 °C (DSC); M.W.: 500.22; <sup>1</sup>H NMR (400 MHz, CDCl<sub>3</sub>) δ 7.90 (d, *J* = 7.7, 2H), 7.76 (d, *J* = 7.6, 2H), 7.42 (t, *J* = 7.5, 2H), 7.32 (dd, *J* = 8.2, 2.0, 2H), 7.29 (d, *J* = 7.6, 2H), 7.20 (d, *J* = 8.2, 2H), 6.98 (dd, *J* = 1.9, 2H), 6.89 (s, 2H); <sup>13</sup>C NMR (100 MHz, CDCl<sub>3</sub>) δ 151.5, 143.4, 138.9, 135.2, 133.5, 132.7, 131.9, 130.5, 128.6, 127.9, 126.7, 122.8, 120.6, 65.2; MS(EI, 20eV) 500.0 (M<sup>+</sup>, 28); TLC R<sub>f</sub>0.35 (CH<sub>2</sub>Cl<sub>2</sub>/hexanes, 1/5).

### 3,7-Bis(*N,N*-diphenylamino)-5,5-spirofluorenyl-5H-dibenzo[*a,d*]cycloheptene (**3d**)

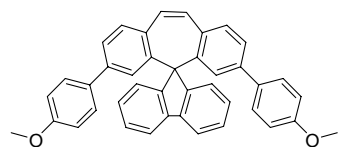

To a 25-mL, two-necked, round-bottomed flask was placed **3** (500 mg, 1 mmol) and Pd(PPh<sub>3</sub>)<sub>4</sub> (35 mg, 0.03 mmol) in DME (25 mL). A solution of 4-methoxyphenylboronic acid (365 mg, 2.4 mmol) and Na<sub>2</sub>CO<sub>3</sub> (318 mg, 3 mmol) in degassed water (12 mL) was added and the whole solution was refluxed for 24 hours. The reaction mixture was quenched with water (20 mL) and extracted with CH<sub>2</sub>Cl<sub>2</sub> (3 × 20 mL). The combined organic layers were dried (MgSO<sub>4</sub>), filtered, and evaporated. The crude residue was purified by column chromatography on silica gel to give **3d**, which was further re-crystallized from CH<sub>2</sub>Cl<sub>2</sub>/hexanes to afford pure **3d** (460 mg, 83 %): m.p. 242 °C (DSC); T<sub>d</sub> 411 °C (TGA); T<sub>g</sub> 118 °C (DSC); M.W.: 554.22; <sup>1</sup>H NMR (400 MHz, CDCl<sub>3</sub>) δ 8.07 (d, *J* = 7.7, 2H), 7.73 (d, *J* = 7.6, 2H), 7.40-7.37 (m, 6H), 7.29 (t, *J* = 7.6, 2H), 7.19 (d, *J* = 8.7, 4H), 7.19 (d, *J* = 2.2, 2H), 6.99 (s, 2H), 6.83 (d, *J* = 8.8, 4H); <sup>13</sup>C NMR (100 MHz, CDCl<sub>3</sub>) δ 159.1, 153.0, 142.0, 140.2, 139.0, 135.0, 133.0, 132.8, 132.6, 128.0, 127.6, 127.4, 127.4, 127.0, 125.1, 120.4, 114.1, 66.3, 55.3; MS (ESI) 554.2 (M<sup>+</sup>, 100); TLC R<sub>f</sub> 0.35 (CH<sub>2</sub>Cl<sub>2</sub>/hexanes, 1/4); HR-MS calcd for C<sub>69</sub>H<sub>46</sub>N<sub>4</sub>: 554.2246, found: 554.2248; Anal. Calcd for C<sub>41</sub>H<sub>30</sub>O<sub>2</sub>: C, 88.78, H, 5.45. Found: C, 88.43, H, 5.46.



### 3,7-Bis(*N,N*-diphenylamino)-5,5-spirofluorenyl-5H-dibenzo[*a,d*]cycloheptene (3f)<sup>6</sup>

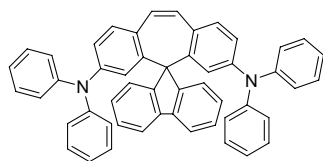

To a 25-mL, two-necked, round-bottomed flask was placed **3** (500 mg, 1 mmol), Pd<sub>2</sub>(dba)<sub>3</sub> (18 mg, 0.02 mmol), sodium *tert*-butoxide (288 mg, 3 mmol), P(*t*-Bu)<sub>3</sub> (0.03 M in toluene, 2 mL, 0.06 mmol), and diphenylamine (372 mg, 2.2 mmol) in toluene (15 mL). The whole solution was refluxed for 12 hours. The reaction mixture was quenched with saturated aqueous NaHCO<sub>3</sub> (20 mL). The aqueous layer was separated and extracted with CH<sub>2</sub>Cl<sub>2</sub> (3 × 20 mL). The combined organic layers were dried (MgSO<sub>4</sub>), filtered, and evaporated. The crude residue was purified by column chromatography on silica gel to give **3f**, which was further re-crystallized from CH<sub>2</sub>Cl<sub>2</sub>/hexanes to afford 643 mg of pure **3f** (95 %): m.p. 287 °C (DSC); T<sub>d</sub> 443 °C (TGA); T<sub>g</sub> 123 °C (DSC); M.W.: 676.84; <sup>1</sup>H NMR (400 MHz, CDCl<sub>3</sub>) δ 7.75 (d, *J* = 7.8, 2H), 7.49 (d, *J* = 7.6, 2H), 7.19-7.08 (m, 12H), 6.97 (t, *J* = 7.3, 4H), 6.89 (d, *J* = 8.2, 10H), 6.82 (s, 2H), 6.79 (t, *J* = 7.6, 2H), 6.54 (d, *J* = 2.2, 2H); <sup>13</sup>C NMR (100 MHz, CDCl<sub>3</sub>) δ 152.0, 147.9, 147.1, 141.5, 138.6, 132.7, 130.7, 129.1, 128.8, 127.3, 127.0, 131.7, 124.8, 123.6, 123.1, 120.2, 119.7, 65.9; MS (ESI) 676.3 (M<sup>+</sup>, 53); TLC R<sub>f</sub> 0.5 (CH<sub>2</sub>Cl<sub>2</sub>/hexane, 1/3).

### *N,N,N',N'*-Tetraphenyl-5H-dibenzo[*a,d*]cycloheptene-3,7-diamine (4f)

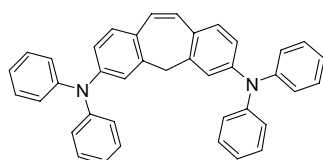

To a 25-mL, two-necked, round-bottomed flask was placed **3,7-Dibromo-5H-dibenzo[*a,d*]cycloheptene** (350 mg, 1 mmol), Pd<sub>2</sub>(dba)<sub>3</sub> (18 mg, 0.02 mmol), sodium *tert*-butoxide (288 mg, 3 mmol), P(*t*-Bu)<sub>3</sub> (0.03 M in toluene, 2 mL, 0.06 mmol), and diphenylamine (372 mg, 2.2 mmol) in anhydrous toluene (15 mL). The whole solution was stirred at reflux for 12 hours. The reaction mixture was quenched with saturated aqueous NaHCO<sub>3</sub> (20 mL). The aqueous layer was separated and extracted with CH<sub>2</sub>Cl<sub>2</sub> (3 × 20 mL). The combined organic layers were dried (MgSO<sub>4</sub>), filtered, and evaporated. The crude residue was purified by column chromatography on silica gel (CH<sub>2</sub>Cl<sub>2</sub>/hexanes, 1/3) to give **4f**. The product was further re-crystallized from CH<sub>2</sub>Cl<sub>2</sub>/hexanes to afford 484 mg of analytically pure **4f** (485 mg, 92 %): m.p. 228 °C (DSC); T<sub>d</sub> 397 °C (TGA); T<sub>g</sub> 101 °C (DSC); M.W.: 526.67; <sup>1</sup>H NMR (400 MHz, CDCl<sub>3</sub>) δ 7.24 (t, *J* = 7.7, 8H), 7.14 (d, *J* = 9.0, 2H), 7.09 (d, *J* = 7.7, 8H), 7.02 (t, *J* = 7.3, 4H), 6.92-6.90 (m, 4H), 6.86 (s,

2H), 3.53 (s, 2H);  $^{13}\text{C}$  NMR (100 MHz,  $\text{CDCl}_3$ )  $\delta$  148.1, 147.6, 138.6, 130.3, 129.6, 129.2, 129.0, 128.5, 122.9, 122.7, 121.2, 41.8; MS (ESI) 526.2 ( $\text{M}^+$ , 100); TLC  $R_f$  0.35 ( $\text{CH}_2\text{Cl}_2$ /hexanes, 1/3).

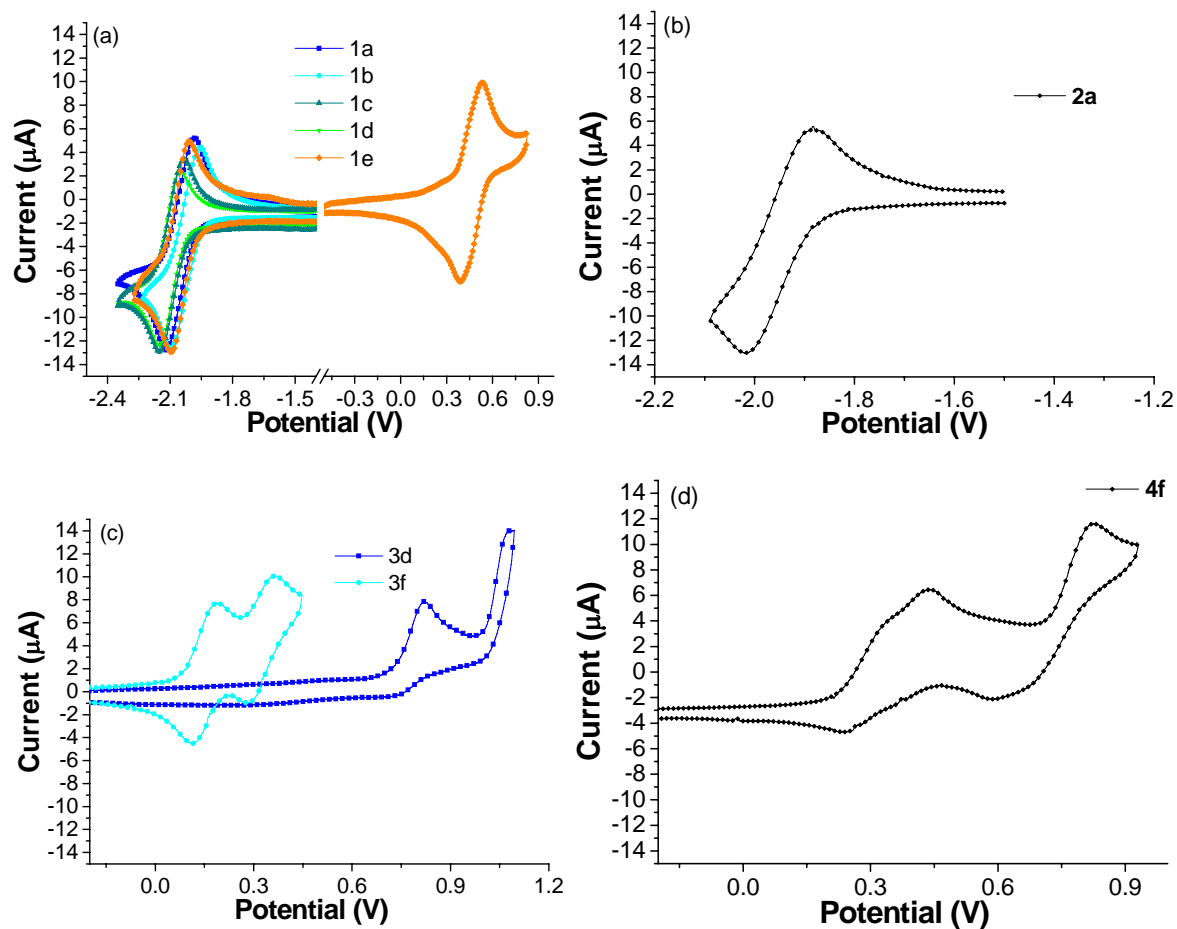

**Figure S1.** Stacked plots of cyclic voltammograms for (a) **1a-e**, (b) **2a**, (c) **3d** and **3f**, and (d) **4f**

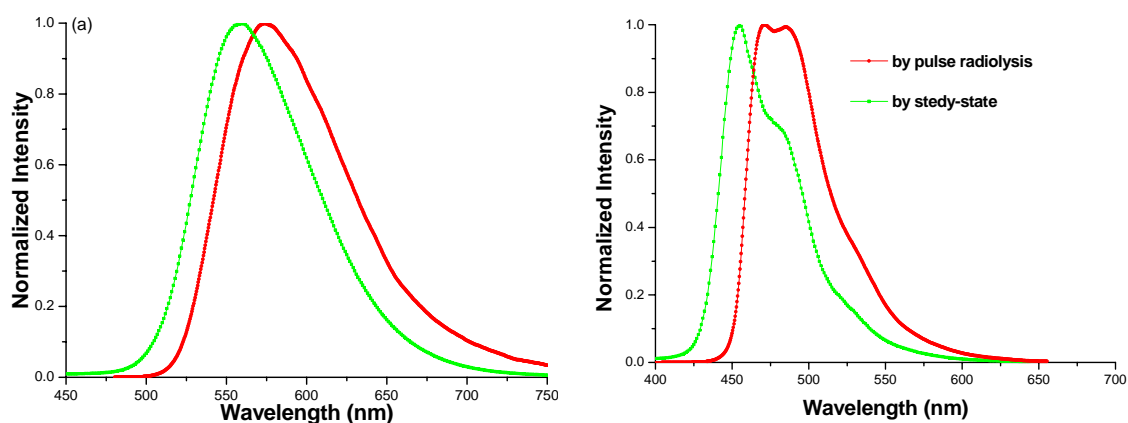

**Figure S2.** Stacked plots of emission spectra of **1e** (a) and **3f** (b) by steady-state at  $10^{-5}\text{M}$  (green) and pulse radiolysis (red) measurements in Ar-saturated benzene.

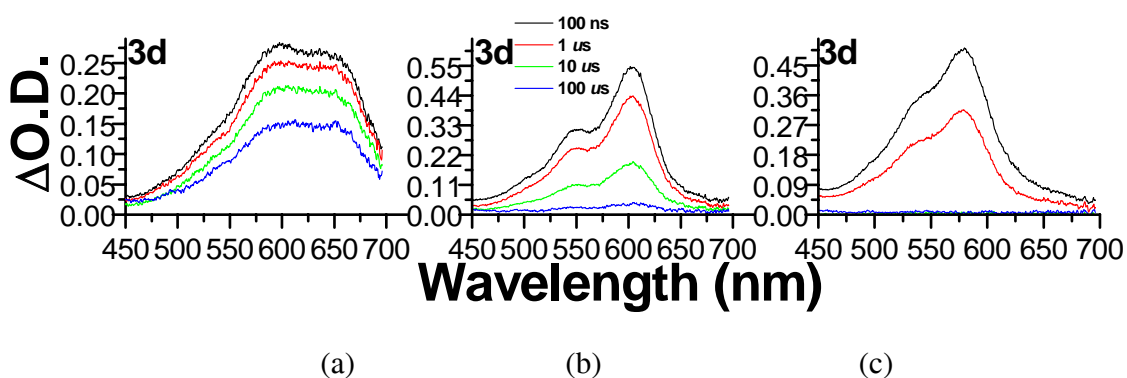

Figure S3. Time-resolved transient absorption spectrum stacked plots of **3d** observed at  $t = 100$  ns (black), 1 (red), 10 (green), and 100  $\mu$ s (blue) after an electron pulse during pulse radiolysis measurements in Ar-saturated (a) DCE, (b) DMF, and (c) benzene solutions.

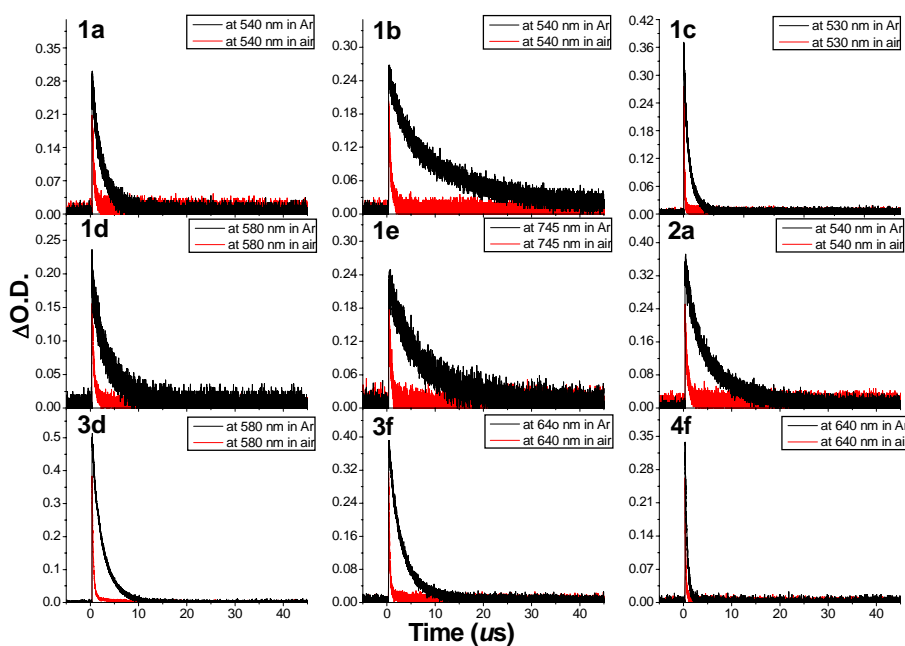

Figure S4. Decay profiles of the triplet excited state observed during the pulse radiolysis for **1a-e**, **2a**, **3d**, **3f**, and **4f** in Ar- and air-saturated benzene solution.

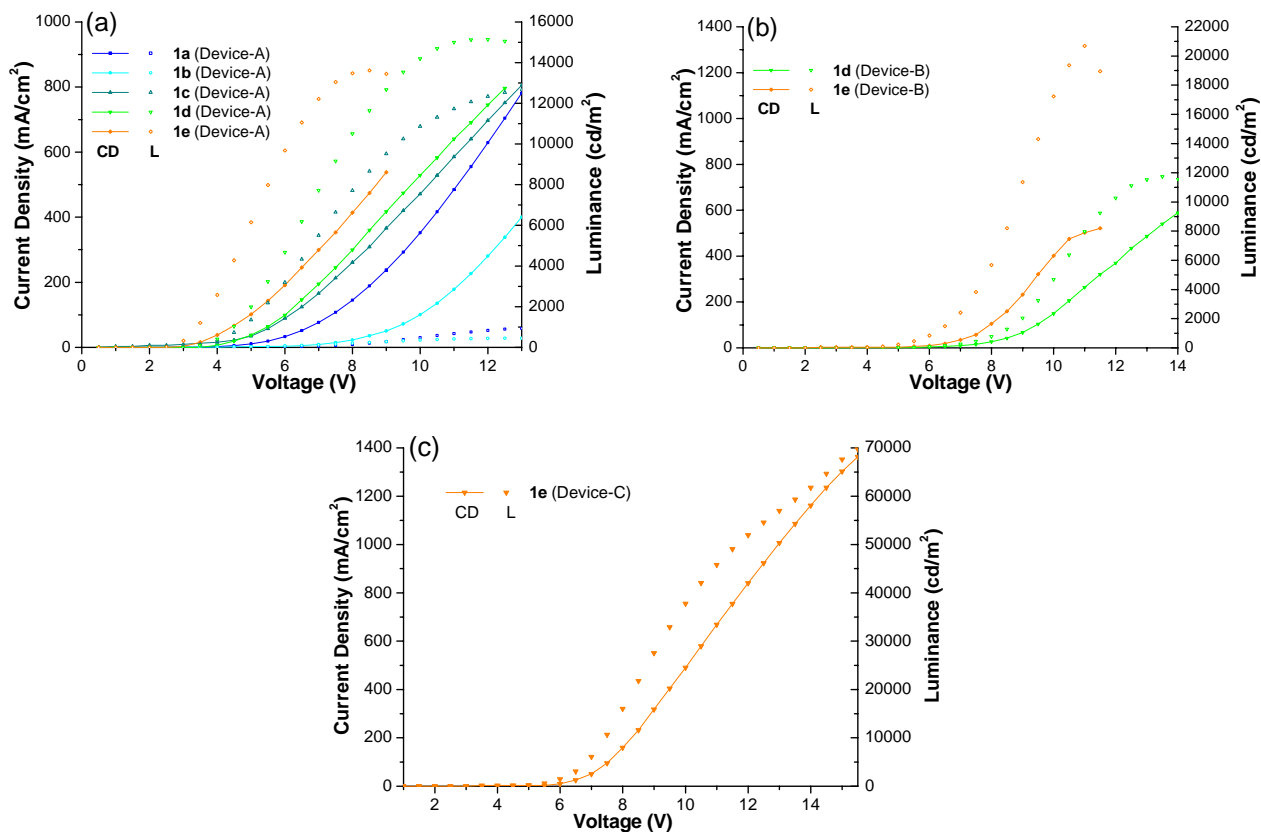

**Figure S5.** The stacked plots of the I-V-L characteristics [the plot of current density (mA/cm<sup>2</sup>, I)/luminescence (cd/m<sup>2</sup>, L) values vs. applied voltage (V, V) obtained for each device configuration] for (a) **1a-e** (Device-A), (b) **1d-e** (Device-B), and (c) **1e** (Device-C)

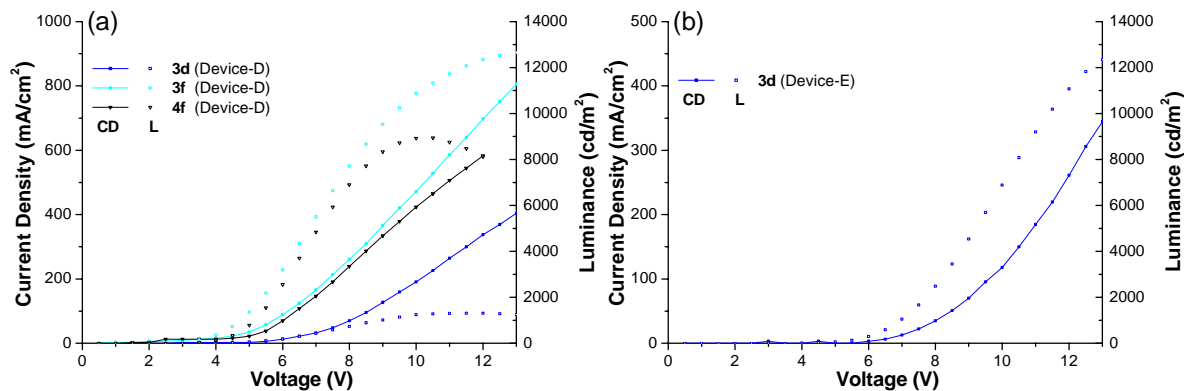

**Figure S6.** The stacked plots of the I-V-L characteristics for (a) **3d**, **3f**, and **4f** (Device-D) and (b) **3f** (Device-E)

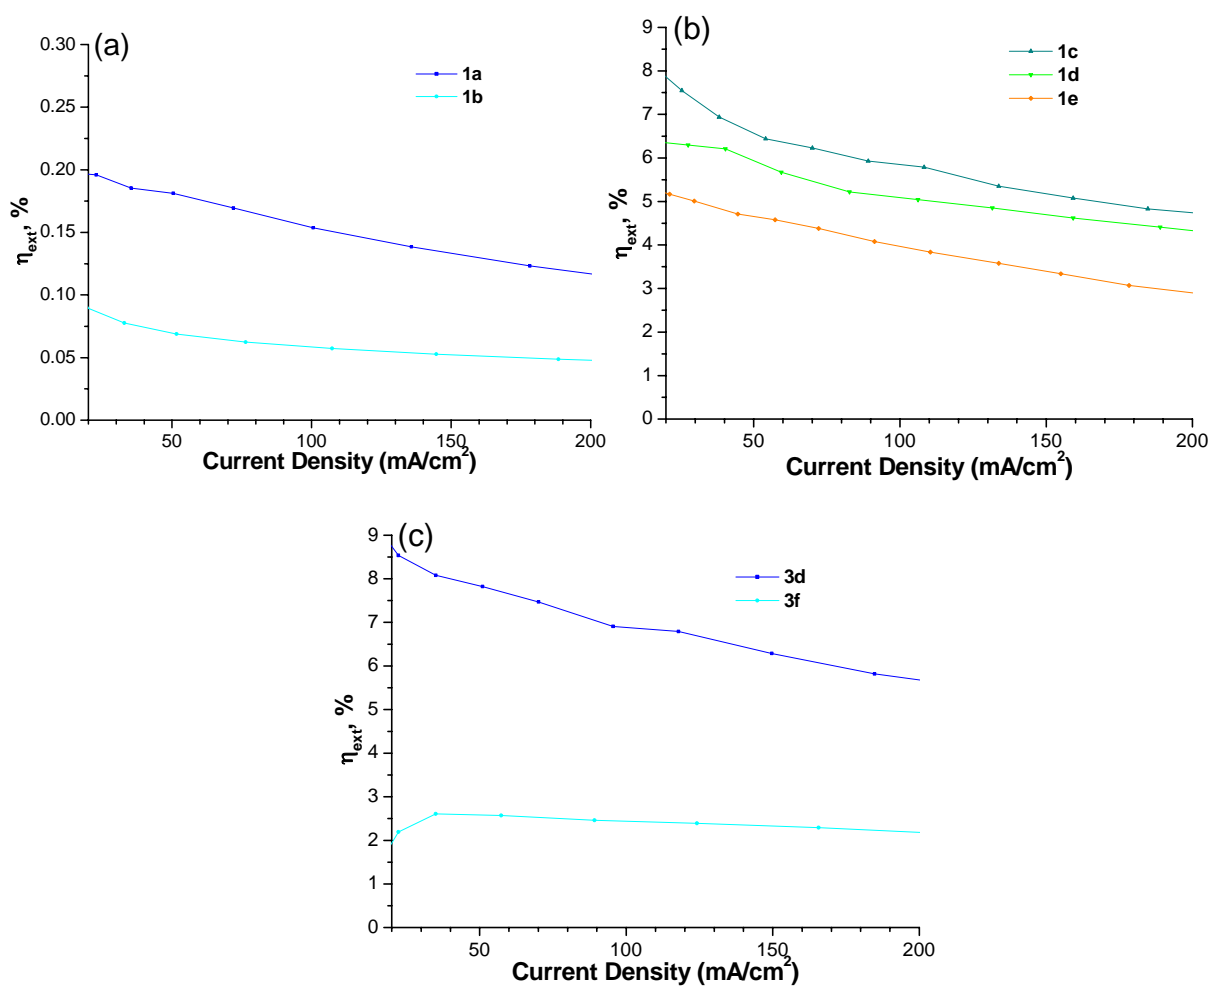

**Figure S7.** Current Density-External quantum efficiency stacked diagram for (a) **1a** and **1b**, (b) **1c-e**, and (c) **3d**, **3f**, and **4f**

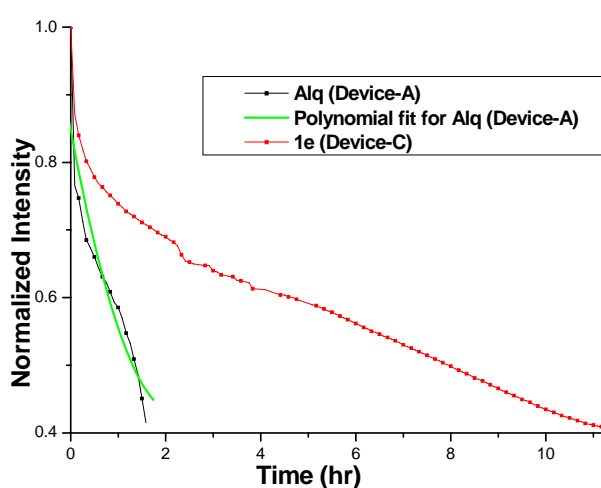

**Figure S8.** Stacked diagram of lifetime measurements for device-A of Alq and device-C of **1e**

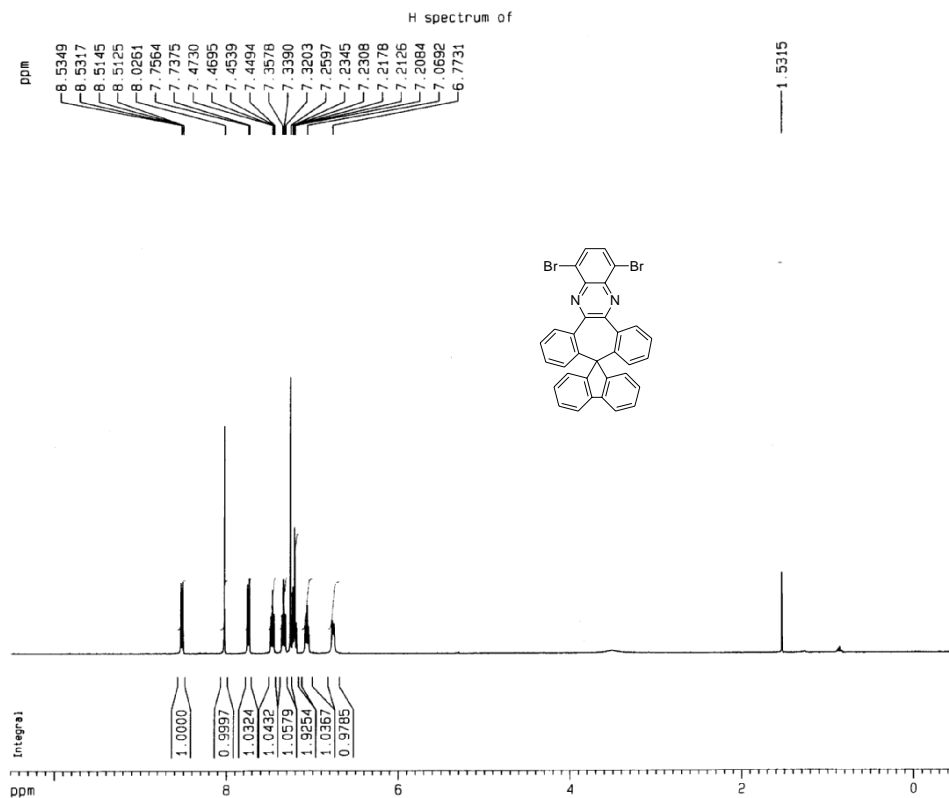

Current Data Parameters  
NAME 2005-03-01  
EXPNO 3  
PROCNO 1

F2 - Acquisition Parameters  
Date\_ 20050302  
Time 8.08  
INSTRUM spect  
PROBHD 5 mm BBO BB-1H  
PULPROG zg30  
TD 15384  
SOLVENT CDCl3  
NS 16  
DS 0  
SWH 5995.204 Hz  
FIDRES 0.365918 Hz  
AQ 1.3664756 sec  
RG 22.6  
DW 83.400 usec  
DE 6.50 usec  
TE 300.0 K  
D1 1.50000000 sec

\*\*\*\*\* CHANNEL f1 \*\*\*\*\*  
NUC1 1H  
P1 10.10 usec  
PL1 3.00 dB  
SF01 400.1326008 MHz

F2 - Processing parameters  
SI 15384  
SF 400.1300091 MHz  
WDW EM  
SSB 0  
LB 0.10 Hz  
GB 0  
PC 1.00

1D NMR plot parameters  
CX 20.00 cm  
CY 6.00 cm  
F1P 10.500 ppm  
F1 4201.37 Hz  
F2P 0.500 ppm  
F2 -200.06 Hz  
PPMCM 0.55000 ppm/cm  
HZCM 220.07150 Hz/cm

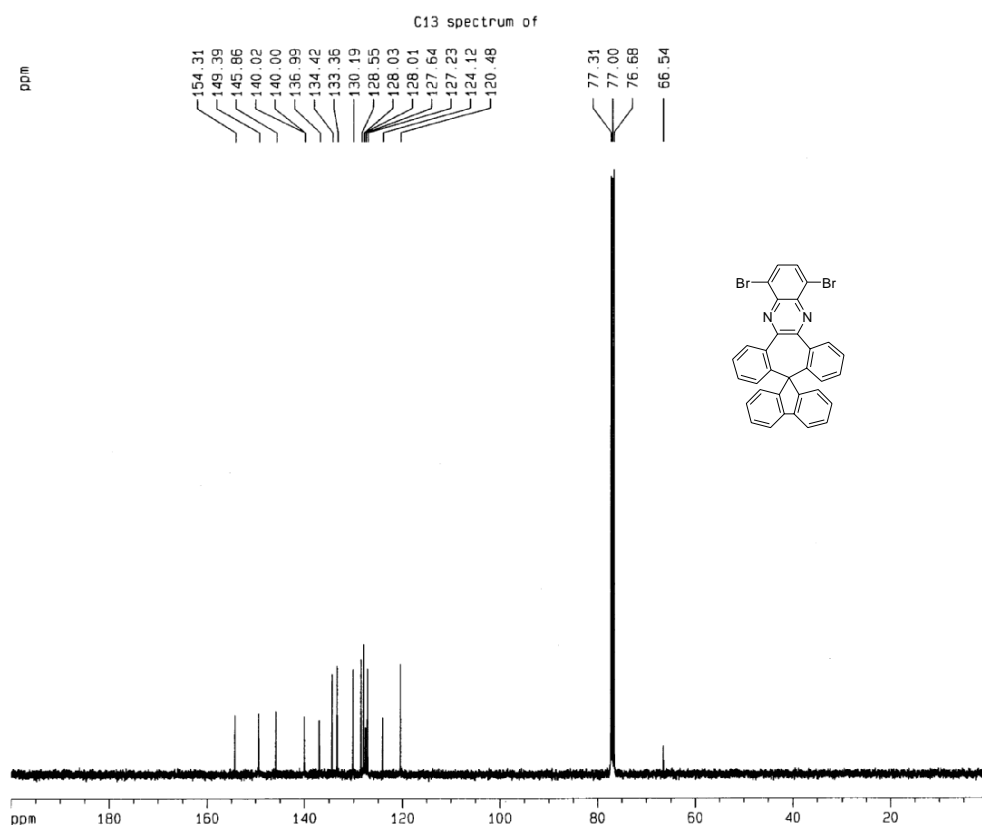

Current Data Parameters  
NAME 2005-03-01  
EXPNO 2  
PROCNO 1

F2 - Acquisition Parameters  
Date\_ 20050301  
Time 8.17  
INSTRUM spect  
PROBHD 5 mm BBO BB-1H  
PULPROG zgpg30  
TD 65536  
SOLVENT CDCl3  
NS 837  
DS 0  
SWH 25125.629 Hz  
FIDRES 0.383387 Hz  
AQ 1.3042164 sec  
RG 4096  
DW 19.900 usec  
DE 6.50 usec  
TE 300.0 K  
D1 1.20000000 sec  
d11 0.03000000 sec  
d12 0.00002000 sec

\*\*\*\*\* CHANNEL f1 \*\*\*\*\*  
NUC1 13C  
P1 10.80 usec  
PL1 7.00 dB  
SF01 100.6242995 MHz

\*\*\*\*\* CHANNEL f2 \*\*\*\*\*  
CPDPRG2 waltz16  
NUC2 1H  
PCPD2 90.00 usec  
PL2 3.00 dB  
PL12 21.83 dB  
PL13 24.80 dB  
SF02 400.1319000 MHz

F2 - Processing parameters  
SI 32768  
SF 100.6127713 MHz  
WDW EM  
SSB 0  
LB 1.00 Hz  
GB 0  
PC 1.40

1D NMR plot parameters  
CX 20.00 cm  
CY 12.50 cm  
F1P 200.000 ppm  
F1 20122.55 Hz  
F2P 0.000 ppm  
F2 0.00 Hz  
PPMCM 10.00000 ppm/cm  
HZCM 1006.12769 Hz/cm

$^1\text{H}$  and  $^{13}\text{C}$  NMR spectra for 1

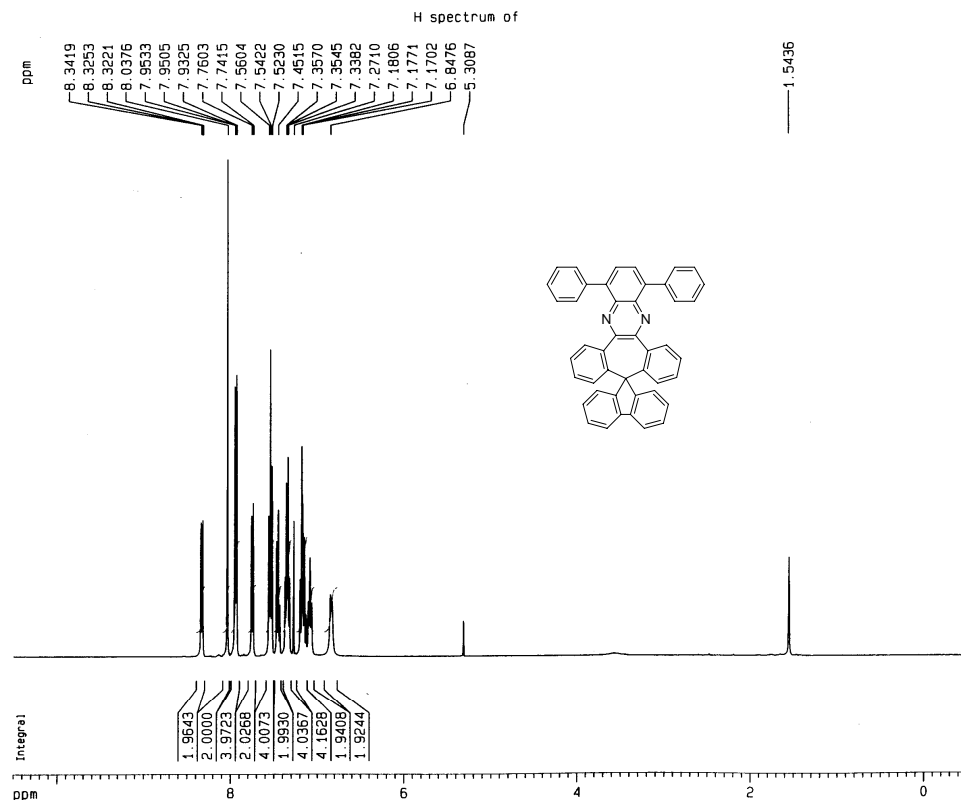

Current Data Parameters  
NAME 05-1  
EXPNO 1  
PROCNO 1

F2 - Acquisition Parameters  
Date\_ 20040610  
Time 20.42  
INSTRUM spect  
PROBHD 5 mm BBO BB-1H  
PULPROG zg30  
TD 16384  
SOLVENT CDCl3  
NS 16  
DS 0  
SWH 5995.204 Hz  
FIDRES 0.365918 Hz  
AQ 1.3664756 sec  
RG 203.2  
DM 83.400 usec  
DE 6.50 usec  
TE 300.0 K  
D1 1.50000000 sec

===== CHANNEL f1 =====  
NUC1 1H  
P1 10.10 usec  
PL1 3.00 dB  
SF01 400.1326008 MHz

F2 - Processing parameters  
SI 16384  
SF 400.1300050 MHz  
WDW EM  
SSB 0  
LB 0.10 Hz  
GB 0  
PC 1.00

1D NMR plot parameters  
CX 20.00 cm  
CY 10.50 cm  
F1P 10.500 ppm  
F1 4201.37 Hz  
F2P -0.500 ppm  
F2 -200.05 Hz  
PPMCM 0.55000 ppm/cm  
HZCM 220.07150 Hz/cm

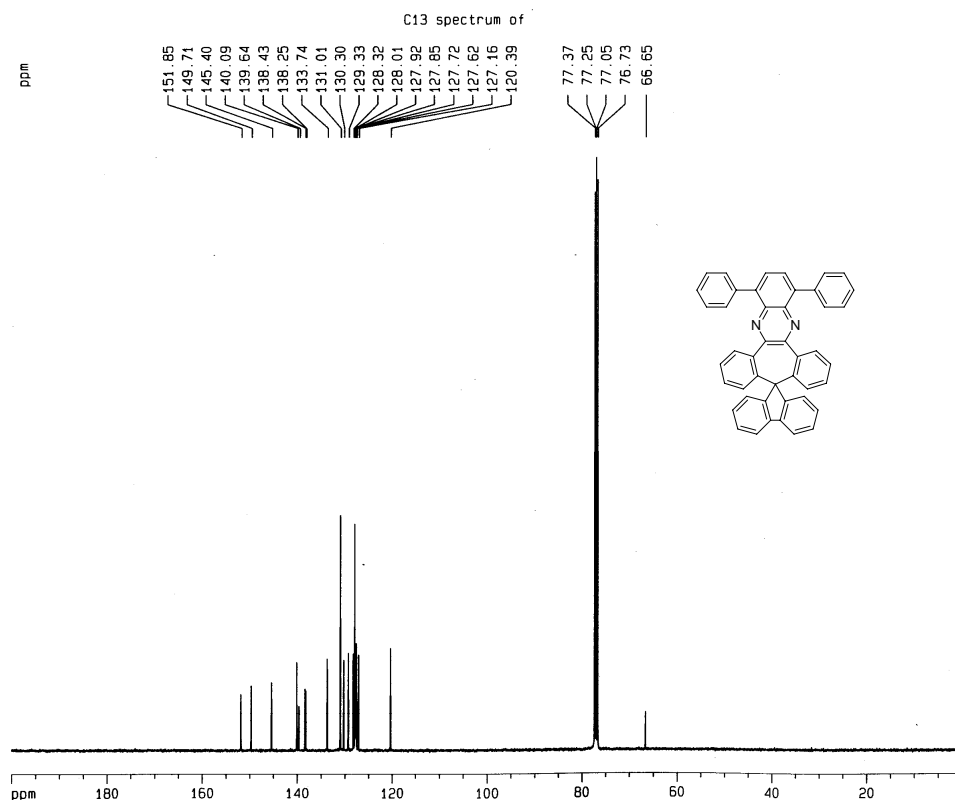

Current Data Parameters  
NAME 05-1  
EXPNO 2  
PROCNO 1

F2 - Acquisition Parameters  
Date\_ 20040612  
Time 11.11  
INSTRUM spect  
PROBHD 5 mm BBO BB-1H  
PULPROG zgpg30  
TD 65536  
SOLVENT CDCl3  
NS 4595  
DS 0  
SWH 25125.629 Hz  
FIDRES 0.383387 Hz  
AQ 1.3042164 sec  
RG 8000  
DM 19.900 usec  
DE 6.50 usec  
TE 300.0 K  
D1 1.20000005 sec  
d11 0.03000000 sec  
d12 0.00002000 sec

===== CHANNEL f1 =====  
NUC1 13C  
P1 10.80 usec  
PL1 7.00 dB  
SF01 100.6242995 MHz

===== CHANNEL f2 =====  
CPDPRG2 waltz16  
NUC2 1H  
PCPD2 90.00 usec  
PL2 3.00 dB  
PL12 21.83 dB  
PL13 24.80 dB  
SF02 400.1319000 MHz

F2 - Processing parameters  
SI 32768  
SF 100.6127672 MHz  
WDW EM  
SSB 0  
LB 1.00 Hz  
GB 0  
PC 1.40

1D NMR plot parameters  
CX 20.00 cm  
CY 5.00 cm  
F1P 200.000 ppm  
F1 20122.55 Hz  
F2P 0.000 ppm  
F2 0.00 Hz  
PPMCM 10.00000 ppm/cm  
HZCM 1006.12769 Hz/cm

$^1\text{H}$  and  $^{13}\text{C}$  NMR spectra for 1a

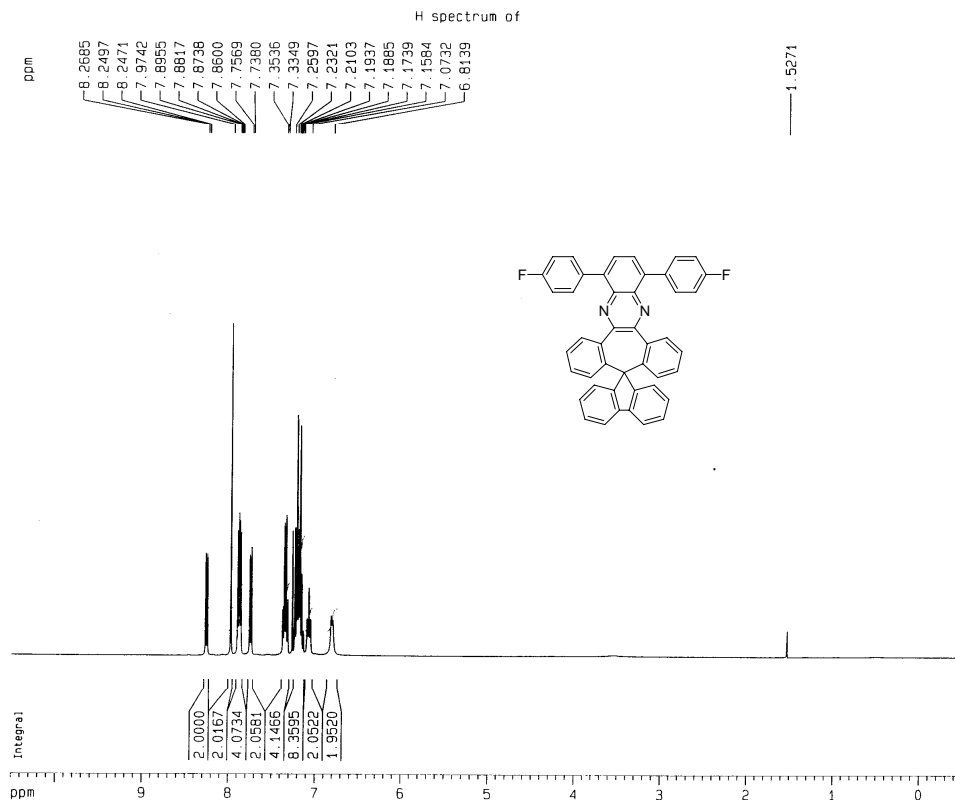

Current Data Parameters  
NAME 2005-03-24  
EXPNO 1  
PROCNO 1

F2 - Acquisition Parameters  
Date\_ 20050324  
Time 8.01  
INSTRUM spect  
PROBHD 5 mm BBO BB-1H  
PULPROG zg30  
TD 16384  
SOLVENT CDCl3  
NS 16  
DS 0  
SWH 5995.204 Hz  
FIDRES 0.365918 Hz  
AQ 1.3664756 sec  
RG 22.6  
DW 83.400 usec  
DE 6.50 usec  
TE 300.0 K  
D1 1.50000000 sec

===== CHANNEL f1 =====  
NUC1 1H  
P1 10.10 usec  
PL1 3.00 dB  
SF01 400.1326008 MHz

F2 - Processing parameters  
SI 16384  
SF 400.1300091 MHz  
WDW EM  
SSB 0  
LB 0.10 Hz  
GB 0  
PC 1.00

1D NMR plot parameters  
CX 20.00 cm  
CY 7.00 cm  
F1P 10.500 ppm  
F1 4201.37 Hz  
F2P -0.500 ppm  
F2 -200.07 Hz  
PPMCM 0.55000 ppm/cm  
HZCM 220.07152 Hz/cm

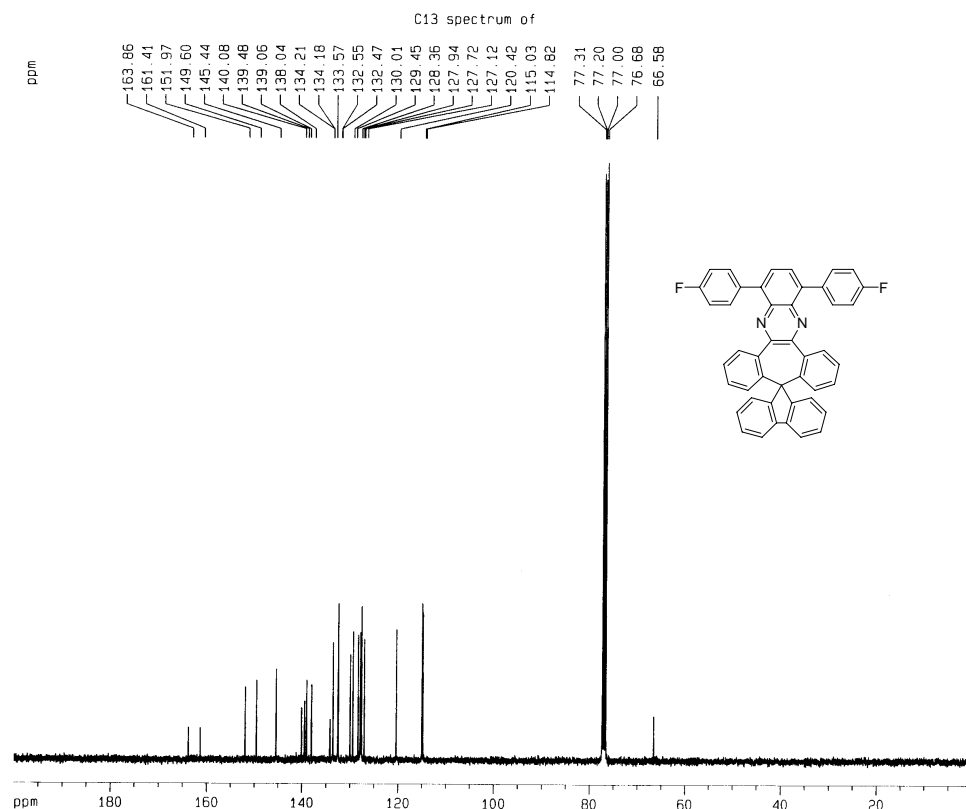

Current Data Parameters  
NAME 2005-03-24  
EXPNO 2  
PROCNO 1

F2 - Acquisition Parameters  
Date\_ 20050324  
Time 8.04  
INSTRUM spect  
PROBHD 5 mm BBO BB-1H  
PULPROG zgpg30  
TD 65536  
SOLVENT CDCl3  
NS 1245  
DS 0  
SWH 25125.629 Hz  
FIDRES 0.383387 Hz  
AQ 1.3042164 sec  
RG 4096  
DW 19.900 usec  
DE 6.50 usec  
TE 300.0 K  
D1 1.20000005 sec  
d11 0.03000000 sec  
d12 0.00002000 sec

===== CHANNEL f1 =====  
NUC1 13C  
P1 10.80 usec  
PL1 7.00 dB  
SF01 100.6242995 MHz

===== CHANNEL f2 =====  
CPDPRG2 waltz16  
NUC2 1H  
PCPD2 90.00 usec  
PL2 3.00 dB  
PL12 21.83 dB  
PL13 24.80 dB  
SF02 400.1319000 MHz

F2 - Processing parameters  
SI 32768  
SF 100.6127713 MHz  
WDW EM  
SSB 0  
LB 1.00 Hz  
GB 0  
PC 1.40

1D NMR plot parameters  
CX 20.00 cm  
CY 12.50 cm  
F1P 200.000 ppm  
F1 20122.55 Hz  
F2P 0.000 ppm  
F2 0.00 Hz  
PPMCM 10.00000 ppm/cm  
HZCM 1006.12769 Hz/cm

$^1\text{H}$  and  $^{13}\text{C}$  NMR spectra for **1b**



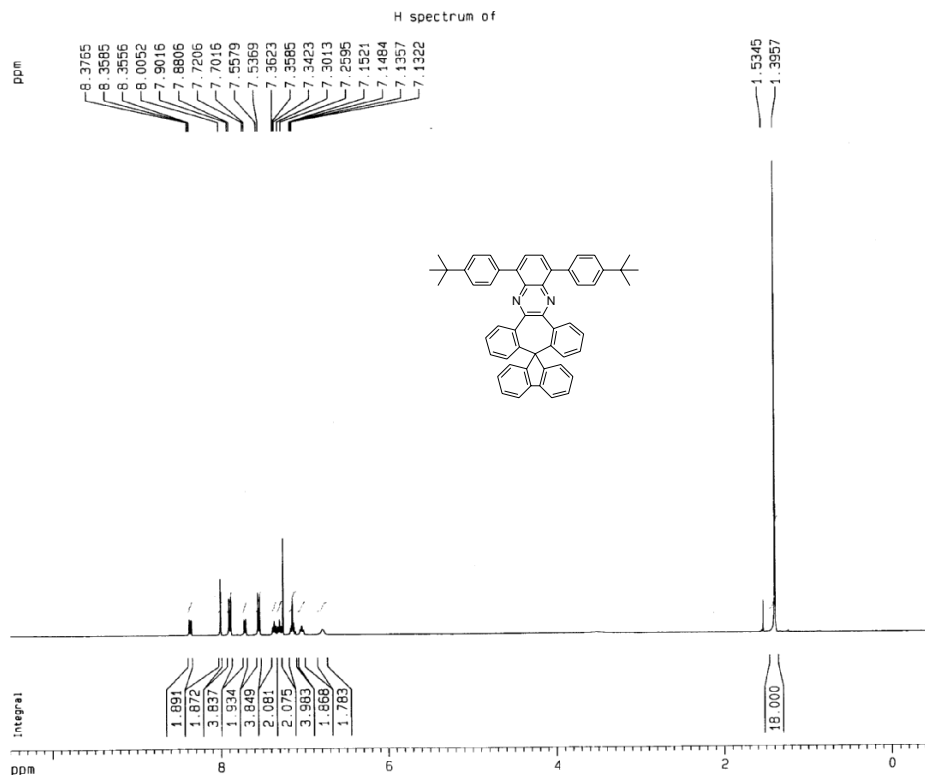

Current Data Parameters  
NAME 2005-03-10  
EXPNO 2  
PROCNO 1

F2 - Acquisition Parameters  
Date\_ 20050310  
Time 9.13  
INSTRUM spect  
PROBHD 5 mm BBO BB-1H  
PULPROG zgpg30  
TD 65536  
SOLVENT CDCl3  
NS 16  
DS 0  
SWH 5995.204 Hz  
FIDRES 0.365918 Hz  
AQ 1.3664756 sec  
RG 22.6  
DM 83.400 usec  
DE 6.50 usec  
TE 300.0 K  
D1 1.50000000 sec

===== CHANNEL f1 =====  
NUC1 1H  
P1 10.10 usec  
PL1 3.00 dB  
SFO1 400.1326008 MHz

F2 - Processing parameters  
SI 16384  
SF 400.1300959 MHz  
WDW EM  
SSB 0  
LB 0.10 Hz  
GB 0  
PC 1.00

1D NMR plot parameters  
CX 20.00 cm  
CY 10.50 cm  
F1P 10.500 ppm  
F1 4201.37 Hz  
F2P ~200.06 Hz  
F2 ~200.06 Hz  
PPMCH 0.55000 ppm/cm  
HZCM 220.07150 Hz/cm

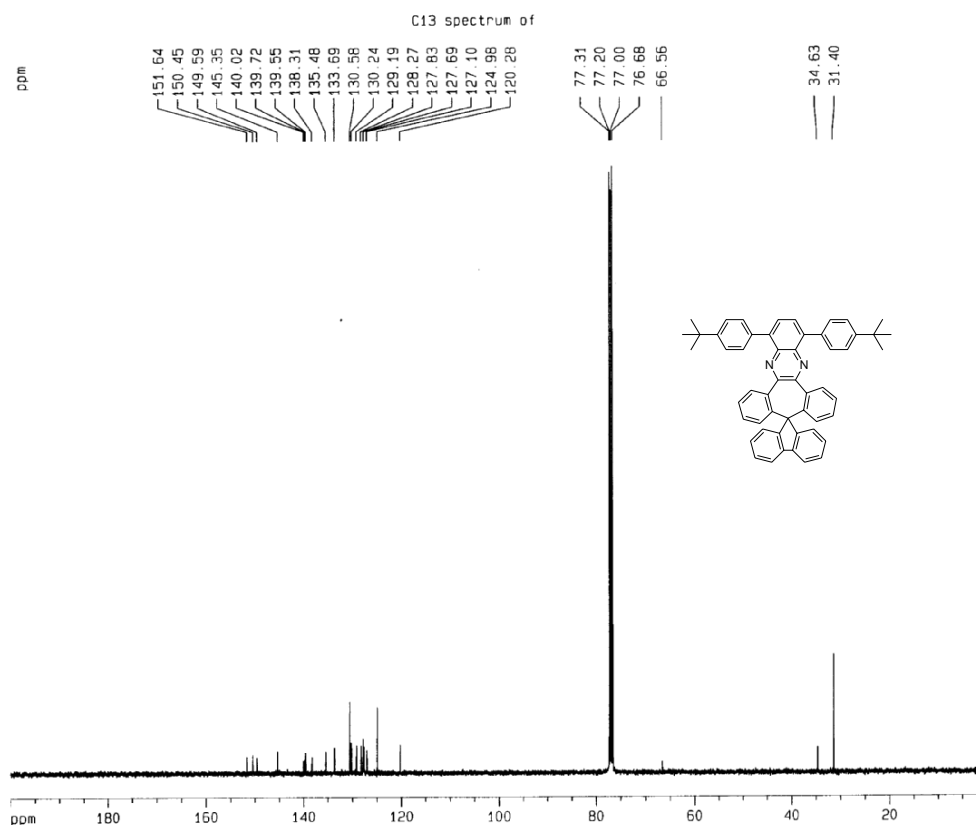

Current Data Parameters  
NAME 2005-03-10  
EXPNO 3  
PROCNO 1

F2 - Acquisition Parameters  
Date\_ 20050310  
Time 9.19  
INSTRUM spect  
PROBHD 5 mm BBO BB-1H  
PULPROG zgpg30  
TD 65536  
SOLVENT CDCl3  
NS 1704  
DS 0  
SWH 25125.629 Hz  
FIDRES 0.383387 Hz  
AQ 1.3042164 sec  
RG 4096  
DM 19.900 usec  
DE 6.50 usec  
TE 300.0 K  
D1 1.20000005 sec  
d11 0.03000000 sec  
d12 0.00002000 sec

===== CHANNEL f1 =====  
NUC1 13C  
P1 10.80 usec  
PL1 7.00 dB  
SFO1 100.6242995 MHz

===== CHANNEL f2 =====  
CPDPRG2 waltz16  
NUC2 1H  
PCPD2 90.00 usec  
PL2 3.00 dB  
PL12 21.83 dB  
PL13 24.80 dB  
SFO2 400.1319000 MHz

F2 - Processing parameters  
SI 32768  
SF 100.6127713 MHz  
WDW EM  
SSB 0  
LB 1.00 Hz  
GB 0  
PC 1.40

1D NMR plot parameters  
CX 20.00 cm  
CY 12.50 cm  
F1P 200.000 ppm  
F1 20122.55 Hz  
F2P 0.000 ppm  
F2 0.00 Hz  
PPMCH 10.00000 ppm/cm  
HZCM 1006.12769 Hz/cm

$^1\text{H}$  and  $^{13}\text{C}$  NMR spectra for **1c**

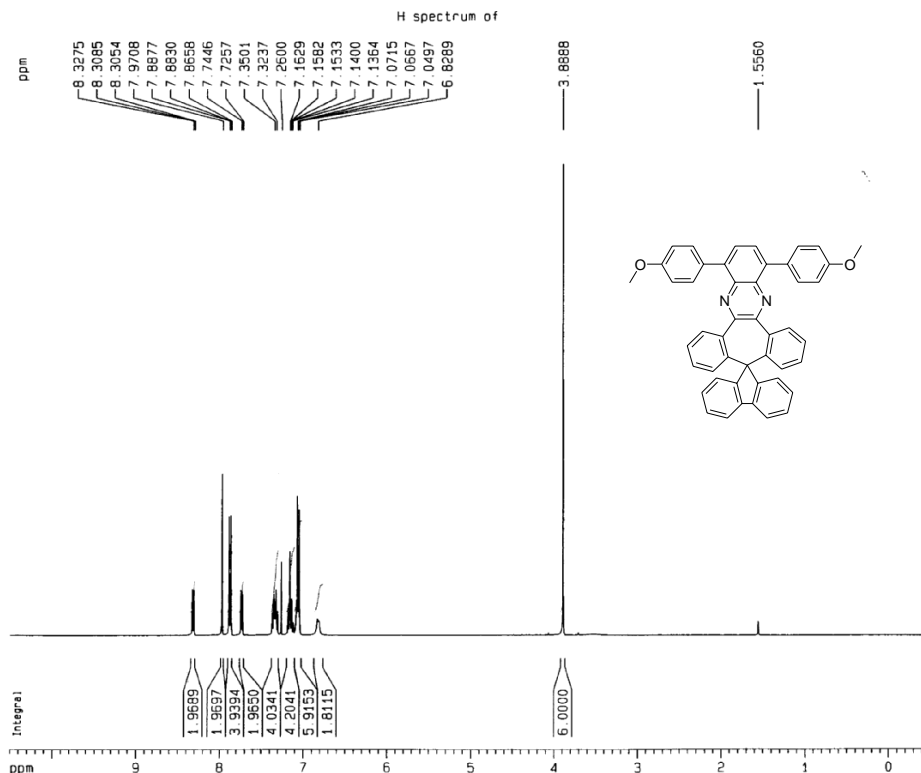

Current Data Parameters  
NAME 2005-04-06  
EXPNO 1  
PROCNO 1

F2 - Acquisition Parameters  
Date\_ 20050406  
Time 6.59  
INSTRUM spect  
PROBHD 5 mm BBO BB-1H  
PULPROG zg30  
TD 16384  
SOLVENT CDCl3  
NS 16  
DS 0  
SWH 5995.204 Hz  
FIDRES 0.365918 Hz  
AQ 1.3654756 sec  
RG 362  
DW 83.400 usec  
DE 6.50 usec  
TE 300.0 K  
D1 1.50000000 sec

===== CHANNEL f1 =====  
NUC1 1H  
P1 10.10 usec  
PL1 3.00 dB  
SFO1 400.1326008 MHz

F2 - Processing parameters  
SI 16384  
SF 400.1300091 MHz  
WDW EM  
SSB 0  
LB 0.10 Hz  
GB 0  
PC 1.00

1D NMR plot parameters  
CX 20.00 cm  
CY 10.50 cm  
F1P 10.500 ppm  
F1 4201.37 Hz  
F2P -0.500 ppm  
F2 -200.07 Hz  
PPMCM 0.55000 ppm/cm  
HZCM 220.07152 Hz/cm

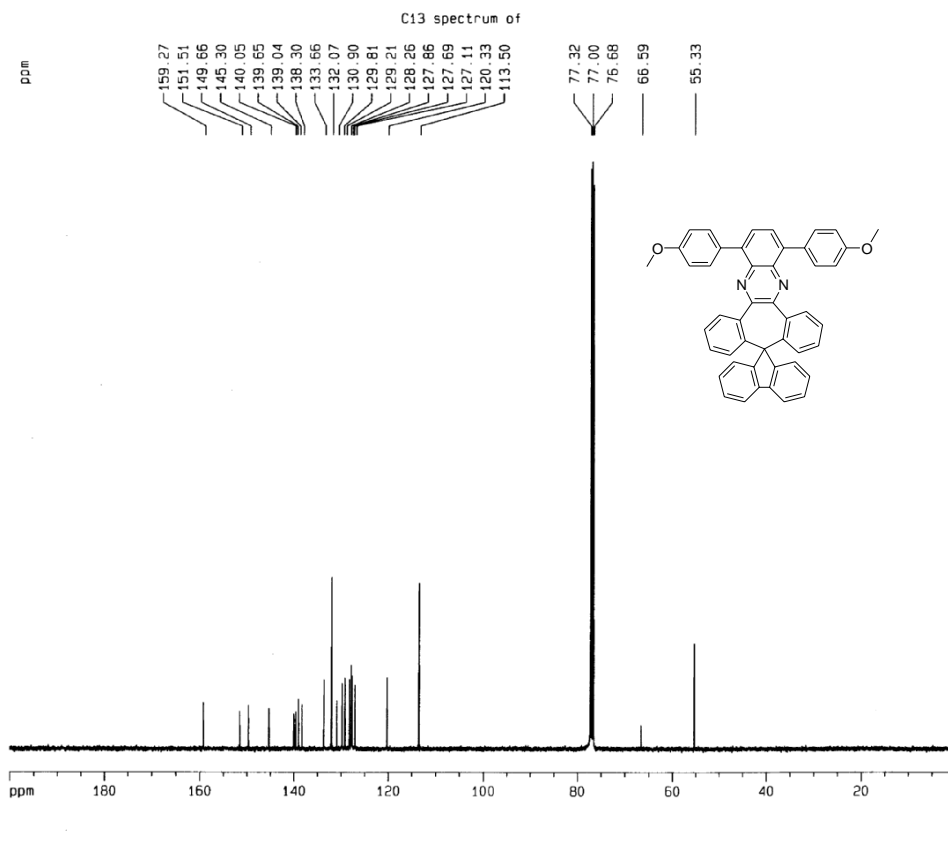

Current Data Parameters  
NAME 2005-04-06  
EXPNO 2  
PROCNO 1

F2 - Acquisition Parameters  
Date\_ 20050406  
Time 7.01  
INSTRUM spect  
PROBHD 5 mm BBO BB-1H  
PULPROG zgpg30  
TD 65536  
SOLVENT CDCl3  
NS 2276  
DS 0  
SWH 25125.629 Hz  
FIDRES 0.383387 Hz  
AQ 1.3042164 sec  
RG 4096  
DW 19.900 usec  
DE 6.50 usec  
TE 300.0 K  
D1 1.20000005 sec  
d11 0.03000000 sec  
d12 0.00002000 sec

===== CHANNEL f1 =====  
NUC1 13C  
P1 10.80 usec  
PL1 7.00 dB  
SFO1 100.6242995 MHz

===== CHANNEL f2 =====  
CPDPRG2 waltz16  
NUC2 1H  
PCPD2 90.00 usec  
PL2 3.00 dB  
PL12 21.83 dB  
PL13 24.80 dB  
SFO2 400.1319000 MHz

F2 - Processing parameters  
SI 32768  
SF 100.6127721 MHz  
WDW EM  
SSB 0  
LB 1.00 Hz  
GB 0  
PC 1.40

1D NMR plot parameters  
CX 20.00 cm  
CY 12.50 cm  
F1P 200.000 ppm  
F1 20122.55 Hz  
F2P 0.000 ppm  
F2 0.00 Hz  
PPMCM 10.00000 ppm/cm  
HZCM 1006.12769 Hz/cm

$^1\text{H}$  and  $^{13}\text{C}$  NMR spectra for **1d**



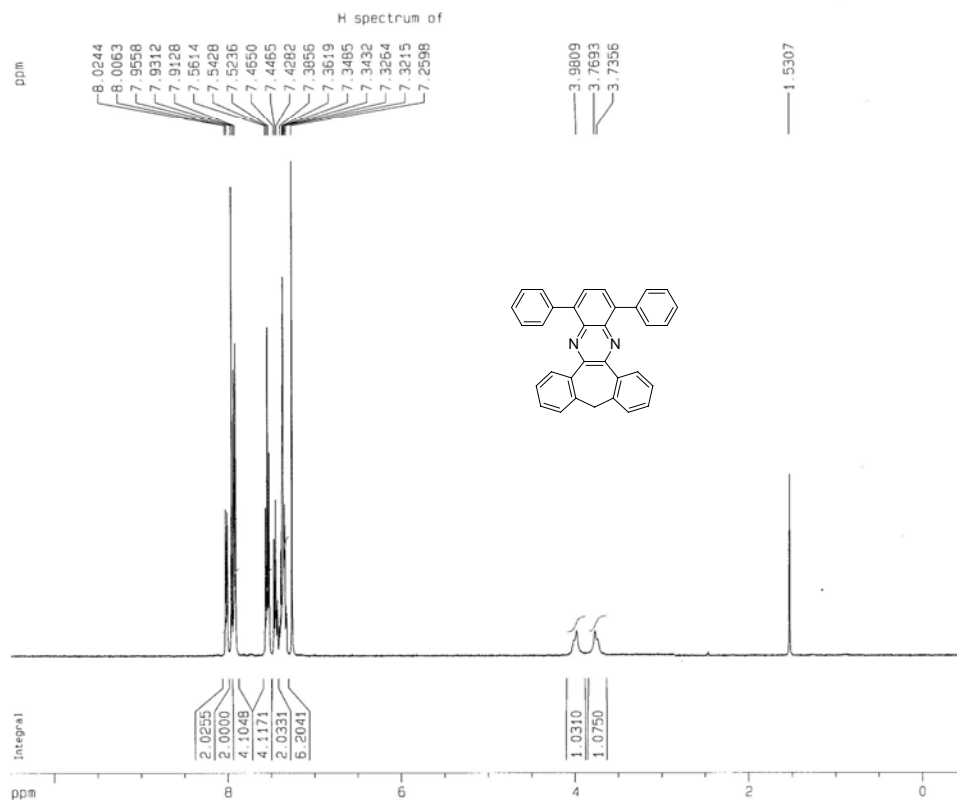

Current Data Parameters

NAME CH2-o-o-Ph  
EXPNO 1  
PROCNO 1

F2 - Acquisition Parameters

Date\_ 20080430  
Time 17.45  
INSTRUM spect  
PROBHD 5 mm BBO BB-1H  
PULPROG zg30  
TD 16384  
SOLVENT CDCl3  
NS 16  
DS 0  
SWH 5995.204 Hz  
FIDRES 0.365918 Hz  
AQ 1.3664756 sec  
RG 22  
DW 83.400 usec  
DE 6.50 usec  
TE 298.6 K  
D1 1.5000000 sec  
MCREST 0.0000000 sec  
MCWRK 0.0150000 sec

\*\*\*\*\* CHANNEL f1 \*\*\*\*\*

NUC1 1H  
P1 10.70 usec  
PL1 2.00 dB  
SF01 400.1326008 MHz

F2 - Processing parameters

SI 16384  
SF 400.1300091 MHz  
WDW EM  
SSB 0  
LB 0.10 Hz  
GB 0  
PC 1.00

1D NMR plot parameters

CX 20.00 cm  
CY 10.50 cm  
F1P 10.500 ppm  
F1 4201.37 Hz  
F2P -0.500 ppm  
F2 -200.06 Hz  
PPMCM 0.55000 ppm/cm  
HZCM 220.07150 Hz/cm

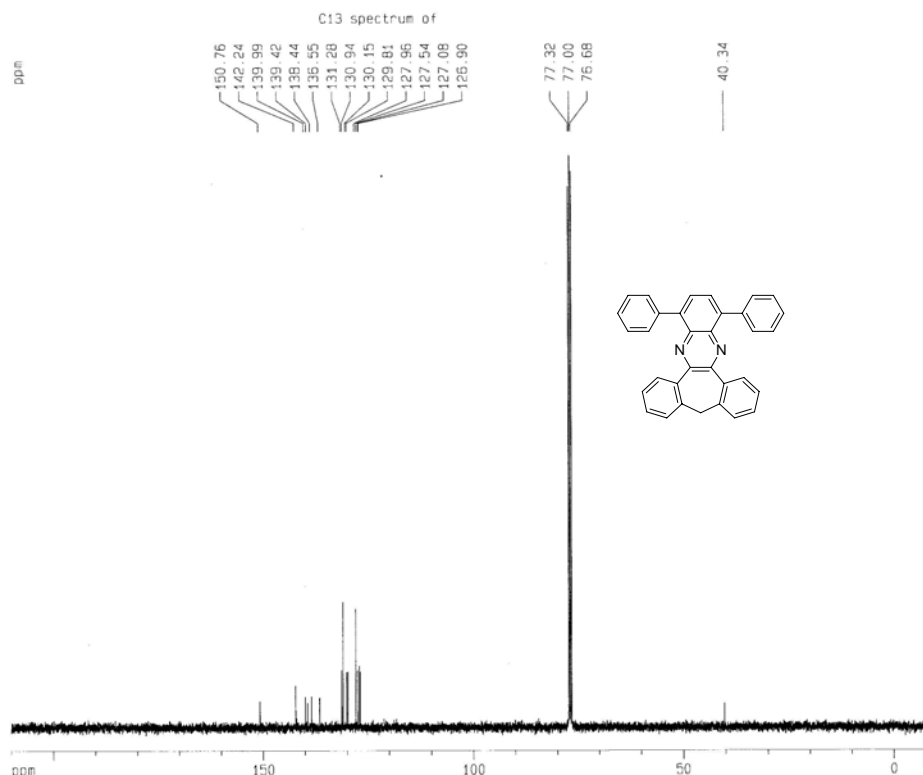

Current Data Parameters

NAME CH2-o-o-Ph  
EXPNO 2  
PROCNO 1

F2 - Acquisition Parameters

Date\_ 20090501  
Time 16.28  
INSTRUM spect  
PROBHD 5 mm BBO BB-1H  
PULPROG zgpg30  
TD 65536  
SOLVENT CDCl3  
NS 220  
DS 0  
SWH 25125.629 Hz  
FIDRES 0.383387 Hz  
AQ 1.3042164 sec  
RG 8000  
DW 19.900 usec  
DE 6.50 usec  
TE 298.6 K  
D1 1.5000000 sec  
d11 0.0300000 sec  
DELTA 1.3999999 sec  
MCREST 0.0000000 sec  
MCWRK 0.0150000 sec

\*\*\*\*\* CHANNEL f1 \*\*\*\*\*

NUC1 13C  
P1 9.80 usec  
PL1 5.00 dB  
SF01 100.6242999 MHz

\*\*\*\*\* CHANNEL f2 \*\*\*\*\*

CPDPRG2 waltz16  
NUC2 1H  
POPRG2 90.00 usec  
PL2 2.00 dB  
PL12 20.00 dB  
PL13 23.00 dB  
SF02 400.1319000 MHz

F2 - Processing parameters

SI 32768  
SF 100.6127713 MHz  
WDW EM  
SSB 0  
LB 1.00 Hz  
GB 0  
PC 1.40

1D NMR plot parameters

CX 20.00 cm  
CY 12.50 cm  
F1P 210.000 ppm  
F1 21129.68 Hz  
F2P -10.000 ppm  
F2 -1006.13 Hz  
PPMCM 11.00000 ppm/cm  
HZCM 1106.74048 Hz/cm

$^1\text{H}$  and  $^{13}\text{C}$  NMR spectra for **2a**

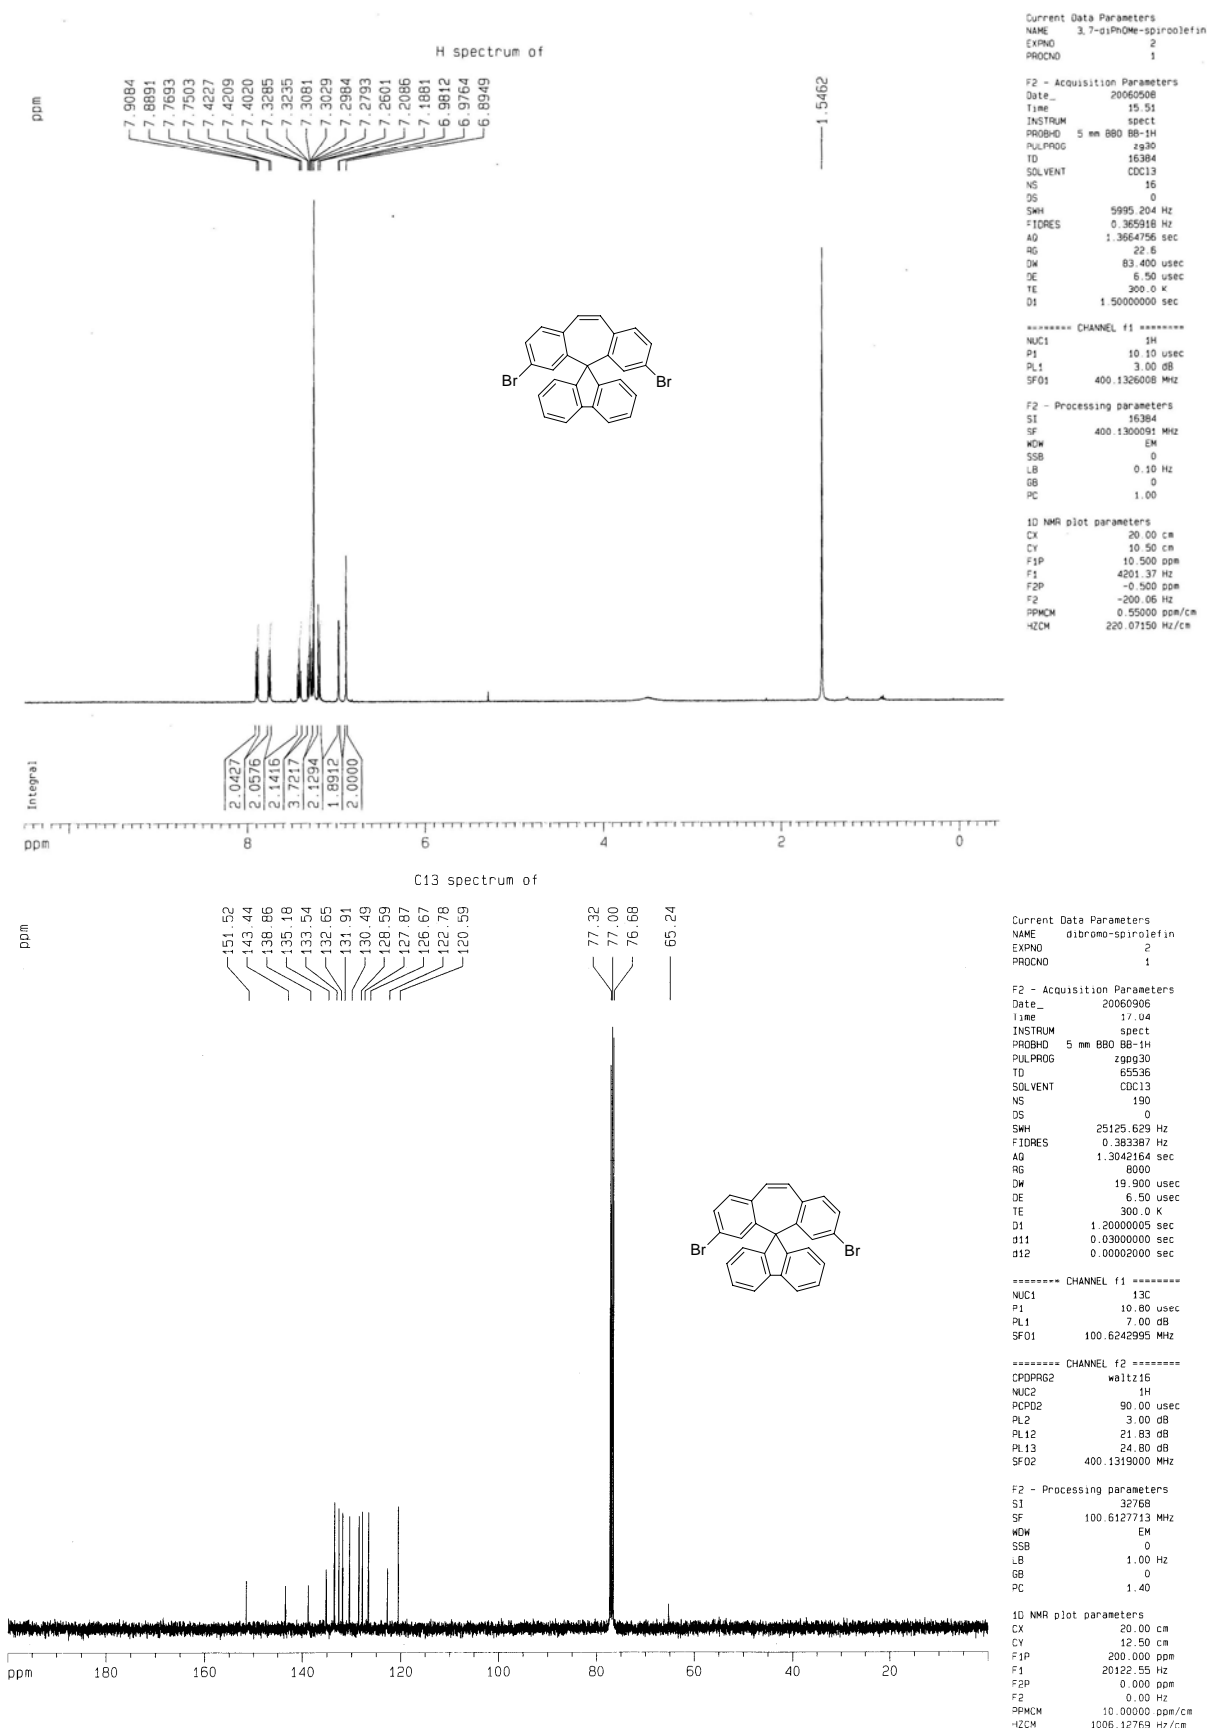

$^1\text{H}$  and  $^{13}\text{C}$  NMR spectra of 3

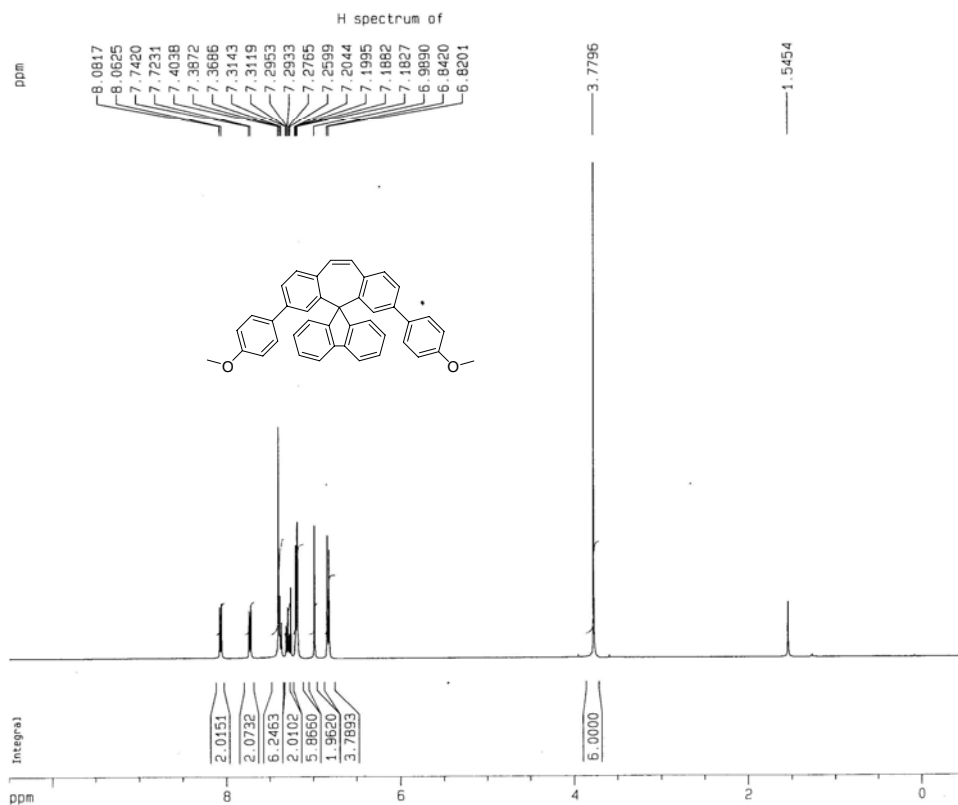

Current Data Parameters  
NAME SSB-diPhOMe  
EXPNO 4  
PROCNO 1

F2 - Acquisition Parameters  
Date\_ 20070928  
Time 18.00  
INSTRUM spect  
PROBHD 5 mm BBO BB-1H  
PULPROG zg30  
TD 16384  
SOLVENT CDCl3  
NS 16  
DS 0  
SWH 5995.204 Hz  
FIDRES 0.365918 Hz  
AQ 1.3664756 sec  
RG 22  
DW 83.400 usec  
DE 6.50 usec  
TE 299.6 K  
D1 1.50000000 sec  
MCREST 0.00000000 sec  
MCWRR 0.01500000 sec

\*\*\*\*\* CHANNEL f1 \*\*\*\*\*  
NUC1 1H  
P1 10.70 usec  
PL1 2.00 dB  
SF01 400.1326008 MHz

F2 - Processing parameters  
SI 16384  
SF 400.1300091 MHz  
WDW EM  
SSB 0  
LB 0.10 Hz  
GB 0  
PC 1.00

1D NMR plot parameters  
CX 20.00 cm  
CY 10.50 cm  
F1P 10.500 ppm  
F1 4201.37 Hz  
F2P -0.500 ppm  
F2 -200.06 Hz  
PPMCM 0.55000 ppm/cm  
HZCM 220.07150 Hz/cm

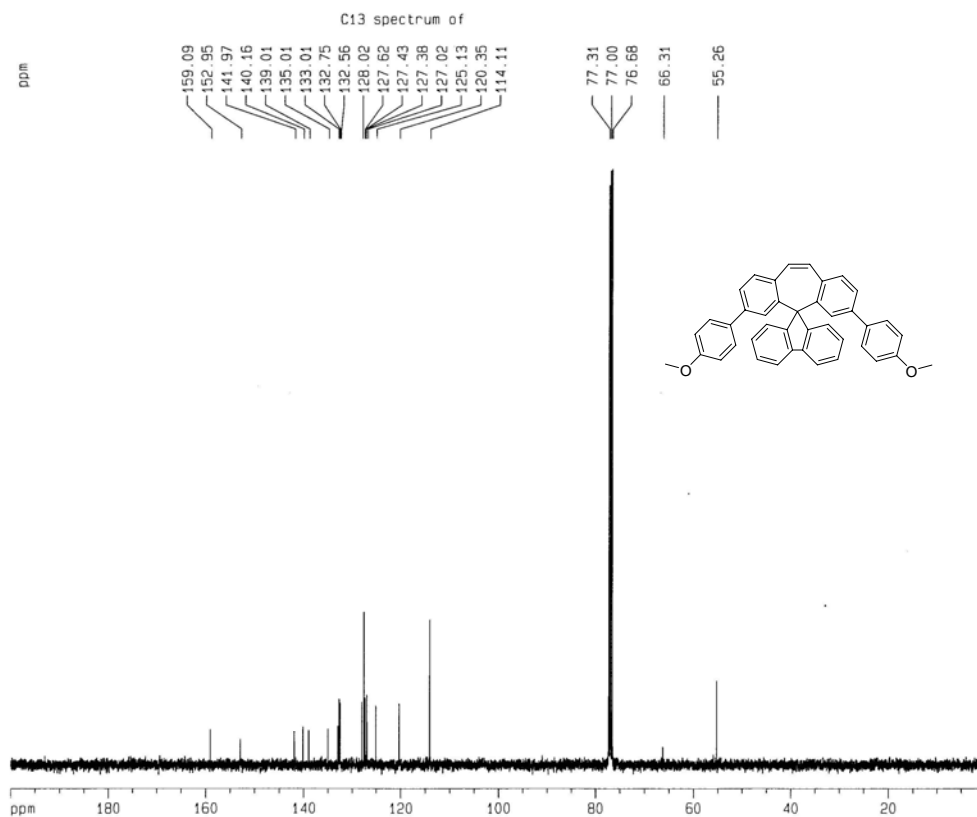

Current Data Parameters  
NAME SSB-diPhOMe  
EXPNO 3  
PROCNO 1

F2 - Acquisition Parameters  
Date\_ 20070927  
Time 18.44  
INSTRUM spect  
PROBHD 5 mm BBO BB-1H  
PULPROG zgpg30  
TD 65536  
SOLVENT CDCl3  
NS 256  
DS 0  
SWH 25125.629 Hz  
FIDRES 0.383387 Hz  
AQ 1.3042164 sec  
RG 8000  
DW 19.900 usec  
DE 6.50 usec  
TE 299.5 K  
D1 1.50000000 sec  
d11 0.03000000 sec  
DELTA 1.39999999 sec  
MCREST 0.00000000 sec  
MCWRR 0.01500000 sec

\*\*\*\*\* CHANNEL f1 \*\*\*\*\*  
NUC1 13C  
P1 9.80 usec  
PL1 6.00 dB  
SF01 100.6242995 MHz

\*\*\*\*\* CHANNEL f2 \*\*\*\*\*  
CPDPRG2 waltz16  
NUC2 1H  
PCPD2 90.00 usec  
PL2 2.00 dB  
PL12 20.00 dB  
PL13 23.00 dB  
SF02 400.1319000 MHz

F2 - Processing parameters  
SI 32768  
SF 100.6127713 MHz  
WDW EM  
SSB 0  
LB 1.00 Hz  
GB 0  
PC 1.40

1D NMR plot parameters  
CX 20.00 cm  
CY 12.50 cm  
F1P 200.000 ppm  
F1 20122.55 Hz  
F2P 0.000 ppm  
F2 0.00 Hz  
PPMCM 10.00000 ppm/cm  
HZCM 1006.12769 Hz/cm

$^1\text{H}$  and  $^{13}\text{C}$  NMR spectra of **3d**

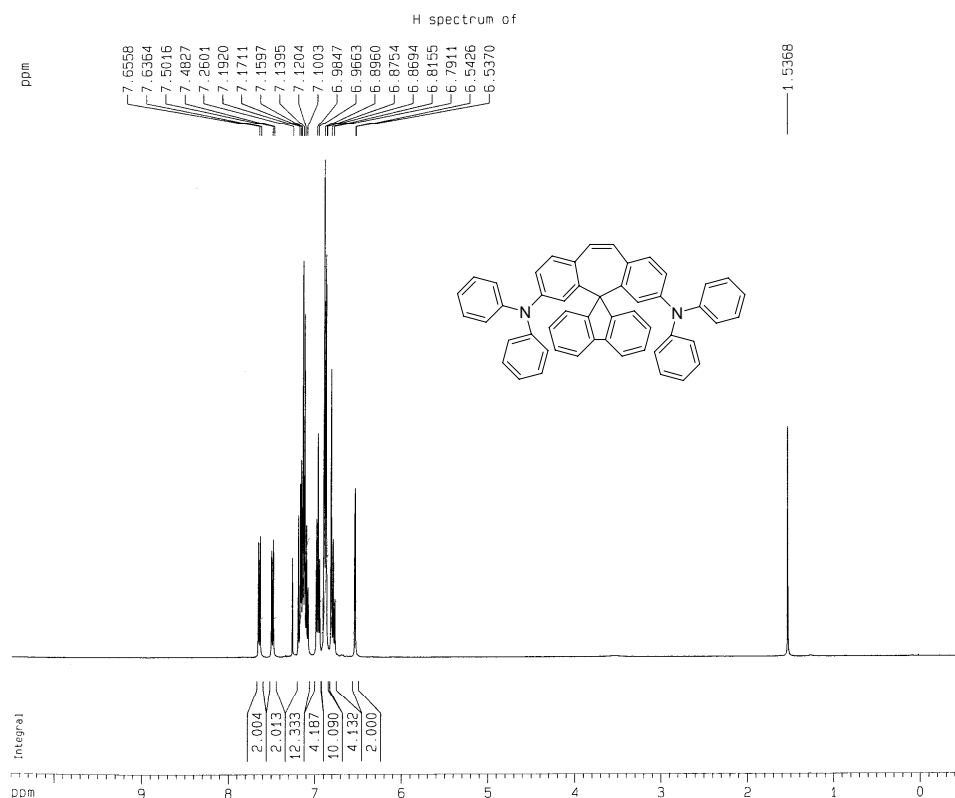

Current Data Parameters  
NAME SSB-N-dPh  
EXPNO 1  
PROCNO 1

F2 - Acquisition Parameters  
Date\_ 20060630  
Time 20.37  
INSTRUM spect  
PROBHD 5 mm BBO BB-1H  
PULPROG zg30  
TD 16384  
SOLVENT CDCl3  
NS 16  
DS 0  
SWH 5995.204 Hz  
FIDRES 0.365918 Hz  
AQ 1.3664756 sec  
RG 22.6  
DW 83.400 usec  
DE 6.50 usec  
TE 300.0 K  
D1 1.50000000 sec

===== CHANNEL f1 =====  
NUC1 1H  
P1 10.10 usec  
PL1 3.00 dB  
SF01 400.1326008 MHz

F2 - Processing parameters  
SI 16384  
SF 400.1300091 MHz  
WDW EM  
SSB 0  
LB 0.10 Hz  
GB 0  
PC 1.00

1D NMR plot parameters  
CX 20.00 cm  
CY 10.50 cm  
F1P 10.500 ppm  
F1 4201.37 Hz  
F2P -0.500 ppm  
F2 -200.07 Hz  
PPMCM 0.55000 ppm/cm  
HZCM 220.07152 Hz/cm

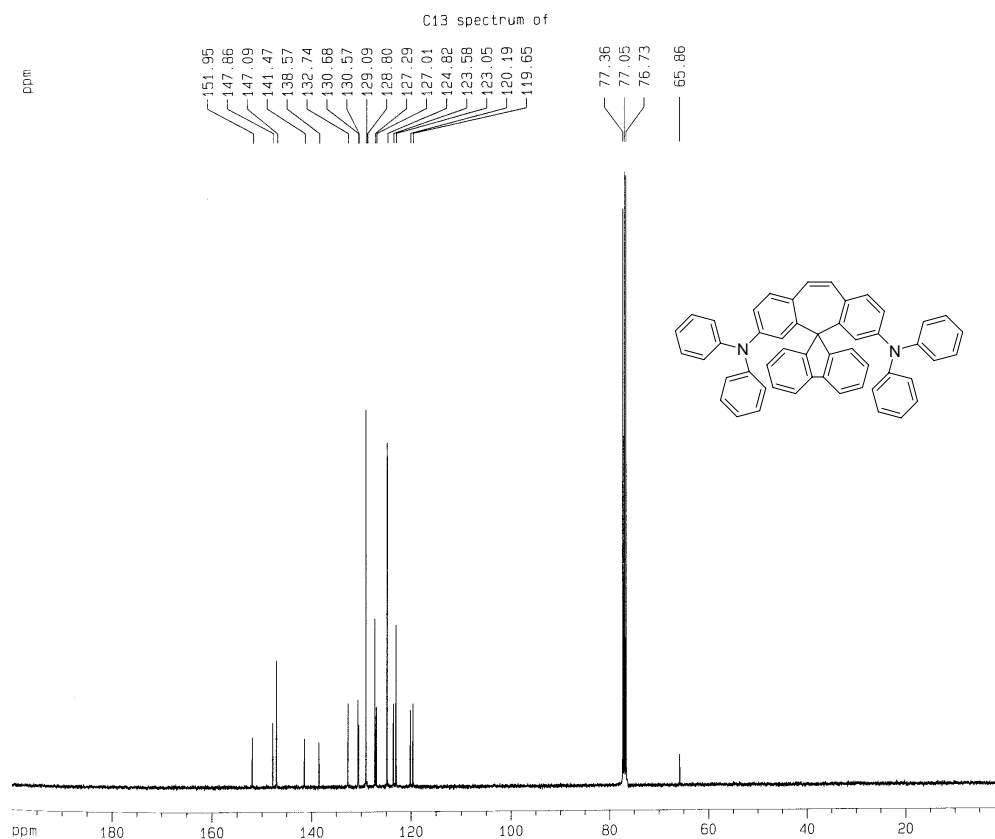

Current Data Parameters  
NAME sss-N-dPh  
EXPNO 2  
PROCNO 1

F2 - Acquisition Parameters  
Date\_ 20060630  
Time 20.51  
INSTRUM spect  
PROBHD 5 mm BBO BB-1H  
PULPROG zgpg30  
TD 65536  
SOLVENT CDCl3  
NS 1913  
DS 0  
SWH 25125.629 Hz  
FIDRES 0.383387 Hz  
AQ 1.3042164 sec  
RG 8000  
DW 19.900 usec  
DE 6.50 usec  
TE 300.0 K  
D1 1.20000005 sec  
d11 0.03000000 sec  
d12 0.00002000 sec

===== CHANNEL f1 =====  
NUC1 13C  
P1 10.80 usec  
PL1 7.00 dB  
SF01 100.6242995 MHz

===== CHANNEL f2 =====  
CPDPRG2 waltz16  
NUC2 1H  
PCPD2 90.00 usec  
PL2 3.00 dB  
PL12 21.83 dB  
PL13 24.80 dB  
SF02 400.1319000 MHz

F2 - Processing parameters  
SI 32768  
SF 100.6127672 MHz  
WDW EM  
SSB 0  
LB 1.00 Hz  
GB 0  
PC 1.40

1D NMR plot parameters  
CX 20.00 cm  
CY 12.50 cm  
F1P 200.000 ppm  
F1 20122.55 Hz  
F2P 0.000 ppm  
F2 0.00 Hz  
PPMCM 10.00000 ppm/cm  
HZCM 1006.12768 Hz/cm

$^1\text{H}$  and  $^{13}\text{C}$  NMR spectra of **3f**

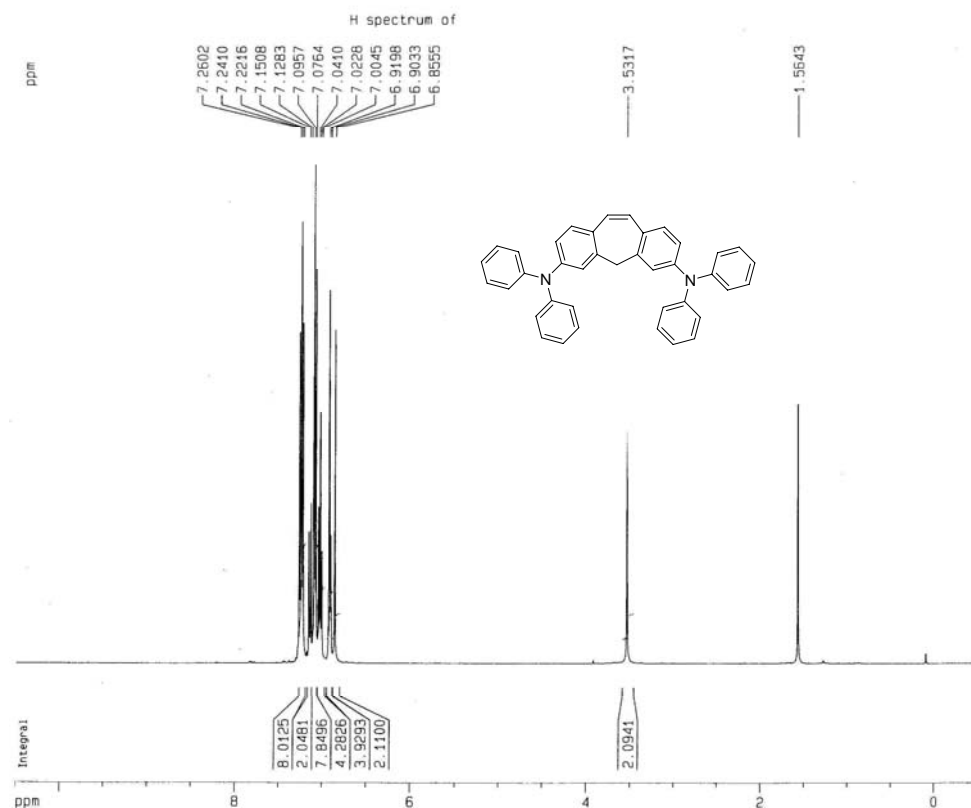

Current Data Parameters  
 NAME 20070313-01  
 EXPNO 2  
 PROCNO 1

F2 - Acquisition Parameters  
 Date\_ 20070314  
 Time 20.04  
 INSTRUM spect  
 PROBHD 5 mm BBO BB-1H  
 PULPROG zg30  
 TD 16384  
 SOLVENT CDCl3  
 NS 16  
 DS 0  
 SWH 5995.204 Hz  
 FIDRES 0.365918 Hz  
 AQ 1.3664756 sec  
 RG 181  
 OW 83.400 usec  
 DE 5.50 usec  
 TE 296.7 K  
 D1 1.50000000 sec  
 MCREST 0.00000000 sec  
 MCWRR 0.01500000 sec

\*\*\*\*\* CHANNEL f1 \*\*\*\*\*  
 NUC1 1H  
 P1 10.70 usec  
 PL1 2.00 dB  
 SF01 400.1326008 MHz

F2 - Processing parameters  
 SI 16384  
 SF 400.1300091 MHz  
 WDW EM  
 SSB 0  
 LB 0.10 Hz  
 GB 0  
 PC 1.00

1D NMR plot parameters  
 CX 20.00 cm  
 CY 10.50 cm  
 FIP 10.500 ppm  
 F1 4201.37 Hz  
 F2P -0.500 ppm  
 F2 -200.06 Hz  
 PPMCM 0.55000 ppm/cm  
 HZCM 220.07150 Hz/cm

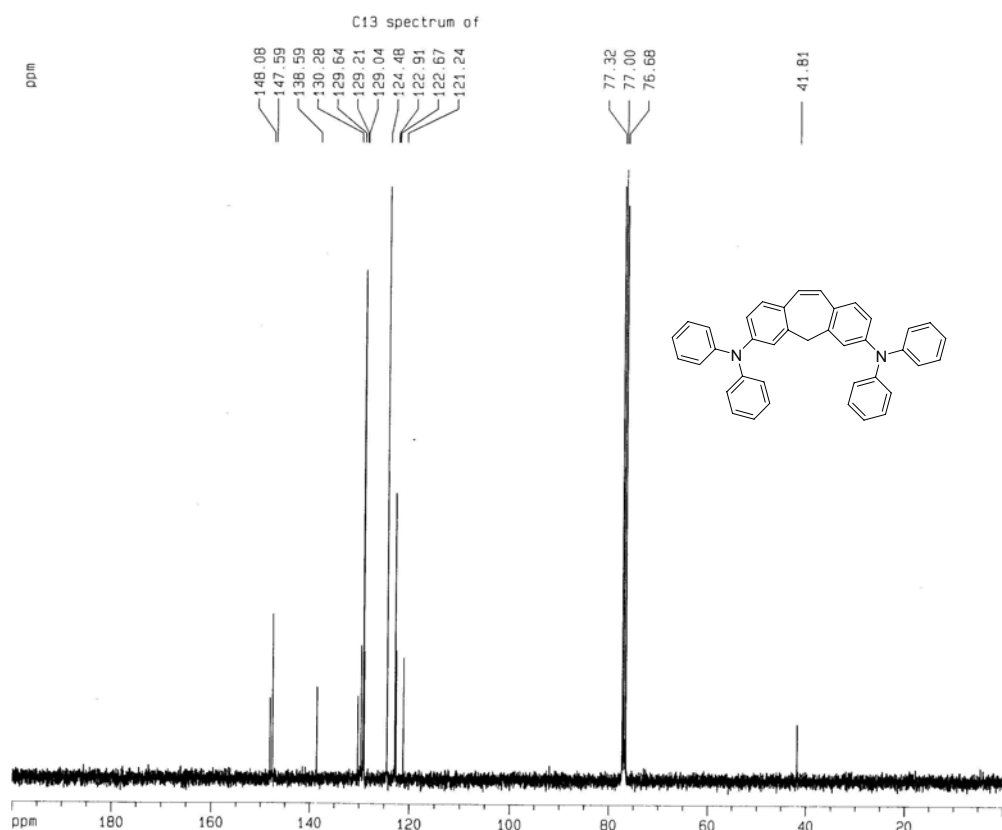

Current Data Parameters  
 NAME 20070313-01  
 EXPNO 3  
 PROCNO 1

F2 - Acquisition Parameters  
 Date\_ 20070314  
 Time 20.08  
 INSTRUM spect  
 PROBHD 5 mm BBO BB-1H  
 PULPROG zgpg30  
 TD 65536  
 SOLVENT CDCl3  
 NS 156  
 DS 0  
 SWH 25125.629 Hz  
 FIDRES 0.383387 Hz  
 AQ 1.3042164 sec  
 RG 8000  
 OW 19.900 usec  
 DE 6.50 usec  
 TE 297.2 K  
 D1 1.20000005 sec  
 d11 0.03000000 sec  
 DELTA 1.10000002 sec  
 MCREST 0.00000000 sec  
 MCWRR 0.01500000 sec

\*\*\*\*\* CHANNEL f1 \*\*\*\*\*  
 NUC1 13C  
 P1 9.80 usec  
 PL1 6.00 dB  
 SF01 100.6242995 MHz

\*\*\*\*\* CHANNEL f2 \*\*\*\*\*  
 CPDPRG2 waltz16  
 NUC2 1H  
 PCPD2 90.00 usec  
 PL2 2.00 dB  
 PL12 20.00 dB  
 PL13 23.00 dB  
 SF02 400.1319000 MHz

F2 - Processing parameters  
 SI 32768  
 SF 100.6127729 MHz  
 WDW EM  
 SSB 0  
 LB 1.00 Hz  
 GB 0  
 PC 1.40

1D NMR plot parameters  
 CX 20.00 cm  
 CY 12.50 cm  
 FIP 200.000 ppm  
 F1 20122.55 Hz  
 F2P 0.000 ppm  
 F2 0.00 Hz  
 PPMCM 10.00000 ppm/cm  
 HZCM 1006.12769 Hz/cm

$^1\text{H}$  and  $^{13}\text{C}$  NMR spectra of **4f**



## References and Notes

- (1) Chen, C.-T.; Wei, Y.; Lin, J.-S.; Moturu, M.V. R. K.; Chao, W.-S.; Tao, Y.-T.; Chien, C.-H. *J. Am. Chem. Soc.* **2006**, *128*, 10992.
- (2) Tsubata Y.; Suzuki T.; Miyashi T.; Yamashita Y. *J. Org. Chem.* **1992**, *57*, 6749.
- (3) Rigaudy, P. J.; Nédélec, L. *Bull. Soc. Chim. Fr.*; **1959**; 638, 642.
- (4) Mancilha, F. S.; Neto, B. A. D.; Lopes , A. S.; Moreira, P. F.; Quina, F. H.; Gonçalves, R. S.; Dupont, J. *Eur. J. Org. Chem.* **2006**, *21*, 4924.
- (5) Wei, Y.; Chen, C.-T. *J. Am. Chem. Soc.* **2007**, *129*, 7478.
- (6) Hartwig, J. F. *Acc. Chem. Res.* **1998**, *31*, 852.
- (7) Complete reference 5a in the manuscript: Anderson, J. D.; McDonald, E. M.; Lee, P. A.; Anderson, M. L.; Ritchie, E. L.; Hall, H. K.; Hopkins, T.; Padias, A.; Thayumanavan, S.; Barlow, S.; Marder, S. R.; Jabbour, G. E.; Shaheen, S.; Kippelen, B.; Peyghambarian, N.; Wightman, R. M.; Armstrong, N. R.; Mash, E. A.; Wang, J. *J. Am. Chem. Soc.* **1998**, *120*, 9646.
